# Supplementary material
Source: publisher site journal article supplement (https://www.spandidos-publications.com/7085/downloadSupplementary)
Supplement: Supplementary file 1 [file downloadSupplementary]

## Sheet: P21120201.clustercDC2_1_diffgen
Table SII. Differential gene expression levels of cDC2 clusters.
gene_id	p_val	avg_logFC	pct.1	pct.2	p_val_adj
IL1B	7.61532e-49	1.84829	0.957	0.568	1.97915e-44
ATF3	7.74631e-53	1.84408	0.907	0.366	2.01319e-48
CXCL8	5.38704e-44	1.7016	0.894	0.359	1.40004e-39
CCL4	2.07695e-20	1.61648	0.795	0.548	5.39778e-16
CCL3	1.92112e-36	1.58188	0.907	0.509	4.99279e-32
DNAJB1	3.49405e-48	1.57302	0.994	0.708	9.08068e-44
CCL4L2	3.62195e-38	1.56315	0.925	0.504	9.41307e-34
CCL3L1	2.2833e-42	1.56258	0.919	0.452	5.93406e-38
DUSP2	4.37675e-36	1.54071	0.739	0.27	1.13747e-31
HSPA1A	3.65174e-46	1.50947	0.994	0.833	9.49052e-42
NR4A2	1.76213e-49	1.4923	0.82	0.231	4.57961e-45
FOSB	2.25686e-52	1.49026	0.969	0.55	5.86535e-48
CXCL2	1.02441e-23	1.47736	0.509	0.143	2.66234e-19
CD83	6.32912e-51	1.45923	0.981	0.482	1.64487e-46
TNFAIP3	7.90517e-45	1.40738	0.969	0.651	2.05447e-40
G0S2	2.98057e-16	1.39551	0.429	0.143	7.74621e-12
HSPH1	8.56876e-31	1.38608	0.932	0.71	2.22694e-26
NR4A1	1.06458e-49	1.36665	0.913	0.42	2.76674e-45
BCL2A1	2.79303e-45	1.35774	0.919	0.455	7.2588e-41
KLF6	1.25472e-43	1.33437	0.988	0.929	3.2609e-39
NR4A3	1.02831e-36	1.29869	0.708	0.204	2.67248e-32
PPP1R15A	3.28348e-49	1.27759	0.988	0.511	8.53342e-45
HSPA1B	3.21833e-45	1.27246	0.981	0.553	8.36412e-41
HSP90AA1	1.2182e-44	1.26867	1	0.998	3.16599e-40
ZFP36	1.28877e-50	1.25545	1	0.956	3.3494e-46
NFKBIZ	1.76519e-41	1.21402	0.87	0.344	4.58754e-37
CD69	2.48459e-17	1.17773	0.82	0.614	6.4572e-13
JUN	1.01297e-43	1.15763	1	0.975	2.63261e-39
BAG3	2.70969e-18	1.15359	0.516	0.184	7.04223e-14
GPR183	7.29752e-32	1.14279	0.969	0.865	1.89655e-27
DUSP1	1.2855e-39	1.14109	0.988	0.919	3.34087e-35
GADD45B	1.39223e-38	1.12619	0.975	0.749	3.61826e-34
PLIN2	7.89855e-10	1.12019	0.789	0.658	2.05275e-05
FOS	1.43748e-35	1.1061	0.994	0.973	3.73588e-31
RGS2	4.21258e-24	1.10193	0.925	0.764	1.09481e-19
HSPA6	8.06612e-07	1.07898	0.422	0.263	0.020963
PMAIP1	3.31872e-28	1.07306	0.739	0.317	8.62502e-24
HSPD1	3.18138e-29	1.0682	0.957	0.857	8.26809e-25
PTGER4	7.64626e-33	1.06655	0.832	0.41	1.98719e-28
NFKBIA	3.35879e-27	1.0472	1	0.995	8.72917e-23
KLF4	1.94775e-37	1.04259	0.901	0.516	5.06202e-33
IER3	4.18729e-26	1.03608	0.932	0.803	1.08824e-21
EGR1	8.8672e-31	1.02105	0.963	0.705	2.3045e-26
RGCC	8.84936e-22	1.02103	0.702	0.329	2.29986e-17
HSPE1	7.78351e-28	1.00214	0.95	0.796	2.02286e-23
NAMPT	1.37559e-30	0.980951	0.814	0.437	3.57502e-26
RGS1	7.77036e-24	0.967641	0.988	0.926	2.01944e-19
AREG	4.34677e-11	0.965263	0.559	0.305	1.12968e-06
HSP90AB1	5.57428e-36	0.938395	0.994	0.995	1.4487e-31
PLEK	4.92872e-23	0.937955	0.969	0.916	1.28093e-18
TWISTNB	0.00603161	0.921667	0.509	0.459	1
CCNL1	1.49902e-34	0.916053	0.95	0.784	3.8958e-30
SGK1	7.41763e-34	0.912026	0.988	0.857	1.92777e-29
IER2	5.36699e-31	0.909129	0.975	0.85	1.39483e-26
RIPK2	6.18769e-20	0.905773	0.727	0.452	1.60812e-15
PTGS2	7.66643e-21	0.905725	0.578	0.197	1.99243e-16
PPP1R15B	2.09137e-29	0.89399	0.795	0.393	5.43526e-25
ZFAND2A	2.34683e-09	0.889754	0.422	0.221	6.09918e-05
SOD2	2.3887e-23	0.877613	0.689	0.359	6.20798e-19
RASGEF1B	3.11678e-23	0.872258	0.627	0.253	8.10021e-19
CXCL3	0.00660219	0.861246	0.143	0.074	1
CLK1	2.14874e-25	0.858742	0.857	0.572	5.58436e-21
UBC	3.88336e-36	0.855235	1	0.99	1.00925e-31
MAFF	7.11585e-39	0.847294	0.646	0.133	1.84934e-34
EGR2	2.71655e-23	0.846105	0.801	0.428	7.06003e-19
OTUD1	4.37746e-25	0.839151	0.59	0.192	1.13766e-20
PHACTR1	4.57407e-30	0.829756	0.857	0.447	1.18875e-25
SAT1	1.2951e-18	0.821111	0.994	0.985	3.36582e-14
EIF4A3	5.3544e-14	0.816765	0.795	0.661	1.39155e-09
PRDM1	5.91699e-12	0.81609	0.491	0.248	1.53777e-07
ICAM1	1.88795e-20	0.809511	0.776	0.494	4.9066e-16
INSIG1	3.0544e-12	0.802598	0.547	0.292	7.93807e-08
HSPB1	1.04918e-06	0.802456	0.882	0.87	0.0272673
CXCR4	1.71193e-20	0.802161	0.938	0.828	4.44914e-16
CDKN1A	3.88556e-19	0.801206	0.845	0.612	1.00982e-14
PDE4B	1.23594e-15	0.80043	0.64	0.356	3.21207e-11
IER5	3.64537e-25	0.797651	0.888	0.568	9.47394e-21
BHLHE40	1.49477e-15	0.78225	0.863	0.757	3.88477e-11
ZFAND5	2.29377e-20	0.78016	0.944	0.833	5.96129e-16
DUSP5	4.39417e-21	0.772979	0.596	0.226	1.142e-16
ARL5B	4.47023e-24	0.758909	0.528	0.155	1.16177e-19
MT-RNR2	1.48304e-38	0.757258	1	1	3.85426e-34
HLA-DRB6	3.20883e-13	0.747614	0.472	0.177	8.33942e-09
DNAJA1	2.25337e-23	0.746968	0.969	0.889	5.85627e-19
TIPARP	3.34553e-11	0.74012	0.634	0.472	8.6947e-07
JUNB	8.65095e-25	0.739469	0.969	0.948	2.2483e-20
PHLDA1	2.22723e-10	0.728052	0.472	0.243	5.78835e-06
TRIB1	1.65571e-19	0.727675	0.77	0.474	4.30303e-15
DNAJB4	2.28372e-19	0.72617	0.627	0.27	5.93515e-15
SOCS3	1.55256e-18	0.725271	0.652	0.349	4.03495e-14
TAGAP	2.75363e-13	0.716875	0.739	0.575	7.1564e-09
RHOB	4.06176e-26	0.715163	0.795	0.373	1.05561e-21
CSRNP1	3.00459e-28	0.707185	0.665	0.231	7.80862e-24
HCAR2	2.87864e-25	0.693293	0.435	0.069	7.48131e-21
KLF2	9.38065e-22	0.686685	0.559	0.187	2.43794e-17
B3GNT5	7.93153e-13	0.68335	0.807	0.666	2.06133e-08
PNRC1	9.04557e-23	0.682663	0.963	0.941	2.35085e-18
PLAUR	4.6633e-09	0.674145	0.64	0.472	0.000121195
MCL1	2.3064e-21	0.671282	0.957	0.853	5.99411e-17
TNF	2.48759e-10	0.669395	0.578	0.324	6.465e-06
ARL4A	7.47833e-13	0.66684	0.503	0.258	1.94354e-08
ZNF331	0.000132805	0.646056	0.304	0.182	1
KLF10	2.6564e-13	0.643936	0.689	0.486	6.90371e-09
CYTIP	1.37954e-12	0.642004	0.807	0.658	3.58529e-08
HBEGF	1.61945e-09	0.632667	0.472	0.238	4.20879e-05
JMJD1C	6.14062e-08	0.626263	0.789	0.735	0.00159589
NLRP3	3.33198e-07	0.62394	0.571	0.4	0.00865948
HCAR3	2.07319e-13	0.621188	0.236	0.039	5.38801e-09
CFLAR	3.53094e-13	0.613862	0.901	0.806	9.17656e-09
MYADM	7.38388e-13	0.610825	0.776	0.636	1.919e-08
CD55	3.98603e-12	0.610457	0.683	0.511	1.03593e-07
SNAI1	1.5417e-21	0.592921	0.435	0.096	4.00672e-17
P2RY13	3.47947e-10	0.587367	0.913	0.889	9.04279e-06
ANXA1	3.02778e-09	0.584771	0.957	0.958	7.8689e-05
IFRD1	2.05114e-18	0.583855	0.578	0.233	5.33072e-14
NEDD9	1.37946e-15	0.575541	0.534	0.229	3.58508e-11
DNAJA4	2.05879e-13	0.565568	0.398	0.14	5.35058e-09
MT-RNR1	2.3898e-27	0.56425	1	1	6.21084e-23
CLDN1	0.0201033	0.563554	0.578	0.558	1
EIF5	1.68196e-18	0.556069	0.894	0.776	4.37124e-14
CHMP1B	8.57744e-08	0.549635	0.627	0.523	0.00222919
ATP2B1-AS1	1.25061e-16	0.549168	0.596	0.27	3.25021e-12
DDIT3	9.95822e-16	0.540379	0.578	0.246	2.58804e-11
JUND	2.56441e-17	0.53897	0.752	0.462	6.66466e-13
KBTBD8	1.3715e-13	0.533856	0.565	0.31	3.56438e-09
SRSF7	1.10109e-09	0.522334	0.938	0.894	2.86163e-05
ZBTB10	7.54043e-12	0.521209	0.46	0.204	1.95968e-07
VEGFA	6.60875e-06	0.520724	0.447	0.319	0.171755
TRA2B	6.52629e-19	0.519469	0.938	0.744	1.69612e-14
CCRL2	7.3752e-11	0.51868	0.491	0.251	1.91674e-06
BRD2	8.76588e-14	0.516943	0.888	0.749	2.27816e-09
TREM1	9.40627e-11	0.513199	0.398	0.162	2.44459e-06
BTG2	7.3465e-09	0.507404	0.882	0.767	0.000190928
CKS2	1.61228e-06	0.501238	0.553	0.405	0.0419016
CHORDC1	1.79218e-09	0.492795	0.634	0.482	4.65769e-05
UBB	2.4463e-12	0.491268	1	0.998	6.35768e-08
HSPA8	9.11083e-11	0.481906	0.988	0.988	2.36781e-06
SLC2A3	4.15901e-09	0.47695	0.503	0.297	0.000108089
BTG1	3.03727e-10	0.465766	0.969	0.924	7.89356e-06
PELI1	4.84837e-10	0.454608	0.422	0.197	1.26004e-05
PLAU	0.00177782	0.454116	0.621	0.604	1
MIR155HG	1.92534e-12	0.441408	0.335	0.101	5.00376e-08
TCP1	2.68558e-11	0.439258	0.807	0.649	6.97956e-07
OLR1	5.42004e-08	0.435293	0.839	0.644	0.00140861
CEBPD	9.22119e-06	0.434411	0.944	0.882	0.239649
KDM6B	3.36796e-16	0.429723	0.472	0.17	8.75298e-12
STX11	5.80632e-07	0.425837	0.429	0.265	0.01509
WSB1	1.57131e-09	0.42278	0.87	0.789	4.08368e-05
SQSTM1	8.89163e-05	0.420612	0.814	0.789	1
SLC20A1	7.79942e-06	0.412674	0.578	0.457	0.202699
EIF4E	0.000212769	0.410307	0.503	0.41	1
FILIP1L	0.000492169	0.409367	0.739	0.688	1
SELENOK	9.16372e-06	0.408283	0.739	0.681	0.238156
SPP1	0.634863	0.404037	0.193	0.229	1
LMNA	0.00224409	0.402991	0.366	0.27	1
TSC22D3	1.78441e-12	0.402908	0.95	0.941	4.63751e-08
EZR	5.35928e-08	0.399635	0.832	0.717	0.00139282
NXF1	4.07537e-12	0.397995	0.634	0.391	1.05915e-07
REL	2.94214e-07	0.392432	0.795	0.703	0.00764632
SRGN	2.97895e-08	0.387808	1	0.993	0.0007742
DUSP6	0.018465	0.387632	0.522	0.489	1
SNHG8	1.216e-07	0.386388	0.845	0.747	0.00316026
EMP1	0.0490224	0.380455	0.273	0.214	1
BCAS2	1.89559e-05	0.377225	0.596	0.504	0.492644
NFE2L2	2.81578e-07	0.374997	0.82	0.73	0.00731793
RNF144B	1.01691e-05	0.371472	0.416	0.27	0.264284
DDX3X	5.80673e-08	0.371276	0.87	0.845	0.00150911
IL1A	5.8146e-12	0.369631	0.23	0.042	1.51116e-07
CITED2	0.000565024	0.368976	0.727	0.717	1
IRF1	0.00436638	0.36689	0.466	0.383	1
BIRC3	3.62423e-10	0.366508	0.516	0.265	9.419e-06
PPP1R10	9.44641e-09	0.364635	0.627	0.45	0.000245503
IFI30	1.86127e-10	0.361011	0.404	0.174	4.83726e-06
USP53	0.000475667	0.360402	0.447	0.339	1
CLEC2B	3.61984e-05	0.360263	0.832	0.769	0.940759
PPIF	4.2231e-05	0.358219	0.584	0.474	1
CREM	2.36693e-06	0.354116	0.416	0.246	0.0615141
RGS16	0.0192197	0.352792	0.292	0.206	1
PDK4	0.102094	0.351416	0.373	0.342	1
MRPL18	4.58829e-06	0.349705	0.752	0.681	0.119245
SLC38A2	3.27647e-05	0.349036	0.72	0.695	0.851522
ETF1	7.40749e-08	0.347836	0.652	0.514	0.00192513
GNA13	0.000980098	0.345863	0.472	0.369	1
ID2	0.000258208	0.345199	0.901	0.88	1
EIF1	3.34886e-17	0.343709	1	1	8.70334e-13
KLHL15	1.86334e-07	0.342787	0.273	0.108	0.00484262
HERPUD1	8.87377e-06	0.341323	0.913	0.865	0.23062
CA2	0.130074	0.333624	0.261	0.216	1
CDC42EP3	0.000310621	0.330874	0.447	0.344	1
PLA1A	1.22417e-11	0.330286	0.317	0.093	3.1815e-07
SRSF3	8.83787e-13	0.328957	0.95	0.902	2.29687e-08
PCF11	0.000362505	0.328758	0.571	0.528	1
ZC3H12A	4.90894e-09	0.32756	0.317	0.123	0.000127578
CCR7	0.0182373	0.326249	0.112	0.057	1
FTH1	1.02608e-13	0.324993	1	1	2.66667e-09
RBM39	2.54677e-09	0.316354	0.95	0.943	6.61881e-05
NFKB1	2.36092e-07	0.315366	0.584	0.408	0.00613579
DNAJB9	0.000284479	0.314426	0.441	0.329	1
SLAMF7	2.12768e-05	0.314401	0.317	0.165	0.552963
NABP1	8.11386e-08	0.311767	0.559	0.376	0.00210871
PER1	9.49229e-06	0.311581	0.491	0.364	0.246695
HLA-DQA2	0.000110809	0.306788	0.478	0.317	1
STK17B	7.90859e-07	0.304572	0.888	0.877	0.0205536
MAP1LC3B	0.0331475	0.301144	0.795	0.826	1
SAV1	0.000452942	0.298348	0.398	0.285	1
MALAT1	5.60662e-15	0.298075	1	1	1.45711e-10
MAP3K8	0.000151837	0.297624	0.553	0.462	1
TCHH	3.64433e-05	0.297236	0.168	0.061	0.947124
EIF4A2	1.40524e-08	0.294747	0.981	0.953	0.000365208
OSM	9.74728e-07	0.294181	0.236	0.091	0.0253322
YBX3	0.0483925	0.292682	0.497	0.484	1
BHLHE41	0.0166753	0.292015	0.534	0.484	1
SIRT1	1.03142e-05	0.291483	0.447	0.305	0.268056
AC002456.1	5.65554e-10	0.289711	0.18	0.032	1.46982e-05
GABARAPL1	0.00195302	0.287842	0.441	0.351	1
ZFP36L1	3.19602e-05	0.287682	0.957	0.902	0.830613
SNHG15	2.32636e-07	0.287076	0.447	0.246	0.00604599
TSC22D2	7.3382e-05	0.286681	0.311	0.174	1
DEDD2	1.296e-07	0.28458	0.398	0.206	0.00336816
HIST1H2BD	1.02811e-05	0.282583	0.242	0.108	0.267195
BCL2	1.71374e-05	0.282015	0.497	0.346	0.445385
HMGCS1	0.017085	0.280558	0.292	0.224	1
KLF9	0.00845018	0.277717	0.565	0.543	1
ADGRE5	0.0258607	0.276204	0.54	0.501	1
IL1RN	0.0255344	0.275659	0.335	0.268	1
TSPYL2	1.67269e-05	0.274034	0.261	0.125	0.434714
MYLIP	0.000326982	0.272694	0.311	0.192	1
SLC3A2	7.94267e-05	0.270551	0.634	0.521	1
GBP2	0.015844	0.27033	0.36	0.285	1
IDI1	0.00537986	0.268298	0.466	0.386	1
AMZ2P1	1.68135e-08	0.265083	0.398	0.187	0.000436965
GTF2B	0.032391	0.264148	0.553	0.563	1
ZNF267	0.008224	0.261838	0.46	0.4	1
NFKBID	0.000127849	0.256894	0.317	0.192	1
AC079305.1	1.7332e-10	0.256807	0.23	0.052	4.50441e-06
CCL5	0.402272	0.256146	0.193	0.172	1
IL1R2	5.59308e-05	0.254232	0.161	0.059	1
CCL2	1.42855e-06	0.252801	0.404	0.211	0.0371266
ARL4C	0.0527539	0.252448	0.391	0.342	1
DDIT4	0.0143232	0.251711	0.671	0.644	1
STK38L	0.0394433	0.250522	0.602	0.629	1
NPTN	2.30365e-07	-0.25015	0.342	0.595	0.00598695
RAD51AP1	3.82029e-06	-0.250248	0.037	0.187	0.0992855
IGLC2	0.0186344	-0.250695	0.106	0.189	1
SSB	1.24618e-05	-0.250896	0.752	0.857	0.323869
TBCA	9.14024e-06	-0.250999	0.59	0.786	0.237546
POLR2B	8.1247e-07	-0.25105	0.354	0.58	0.0211153
CEACAM4	7.0064e-07	-0.251339	0.143	0.349	0.0182089
UCP2	8.1679e-05	-0.251547	0.764	0.848	1
CAP1	1.01283e-07	-0.252155	0.925	0.975	0.00263224
CDK1	0.000611777	-0.252299	0.068	0.182	1
MT-ND6	1.1956e-08	-0.252337	0.292	0.582	0.000310724
SORT1	1.27467e-08	-0.252531	0.298	0.572	0.000331274
CKB	0.00672554	-0.253127	0.354	0.469	1
DOCK8	1.41728e-06	-0.253252	0.596	0.811	0.0368337
ATP5MD	3.66997e-07	-0.253758	0.745	0.88	0.00953788
ATP5MPL	2.75776e-08	-0.254047	0.752	0.914	0.000716716
ATP6V0D1	2.51154e-06	-0.254481	0.621	0.779	0.0652723
MFSD1	3.11258e-07	-0.254509	0.764	0.857	0.00808929
CCNG2	4.78708e-05	-0.254798	0.286	0.457	1
CD86	3.77424e-06	-0.25512	0.814	0.909	0.0980888
HLA-DRB1	1.51442e-11	-0.255234	1	1	3.93584e-07
ATP5PB	6.84385e-07	-0.255487	0.795	0.921	0.0177865
MRPL51	3.24874e-06	-0.255505	0.522	0.708	0.0844314
MRPL33	5.82948e-06	-0.256032	0.516	0.71	0.151502
MAPKAPK3	1.17847e-07	-0.25621	0.398	0.631	0.00306272
NDUFB4	2.54466e-07	-0.256348	0.702	0.87	0.00661332
BLOC1S1	1.42955e-07	-0.256583	0.627	0.786	0.00371525
CAPZB	2.8867e-09	-0.256775	0.907	0.966	7.50225e-05
SMC1A	4.8966e-07	-0.256776	0.391	0.634	0.0127258
SRP9	1.04862e-06	-0.257529	0.714	0.875	0.0272525
SNRPD3	7.14771e-07	-0.257711	0.646	0.833	0.0185762
UQCRFS1	2.78605e-06	-0.257997	0.54	0.727	0.0724066
ARL6IP1	0.000474276	-0.259671	0.547	0.73	1
UFL1	1.45653e-05	-0.25969	0.385	0.58	0.378538
AQP3	6.19159e-06	-0.259835	0.124	0.305	0.160913
CYB561D2	3.18654e-09	-0.259951	0.174	0.435	8.28149e-05
CLNS1A	8.83357e-08	-0.260214	0.534	0.769	0.00229576
YY1	3.25133e-07	-0.260422	0.522	0.754	0.00844988
MYBL1	1.71072e-05	-0.260866	0.112	0.278	0.444599
IGFBP7	8.23569e-06	-0.261032	0.503	0.71	0.214037
LDHB	4.33364e-07	-0.26107	0.733	0.857	0.0112627
CWC15	1.07209e-07	-0.261867	0.491	0.715	0.00278627
CFL1	1.17346e-12	-0.262015	1	1	3.04971e-08
IFIH1	0.000198701	-0.262615	0.373	0.533	1
IDH2	3.61989e-05	-0.262693	0.522	0.7	0.940774
TRPM4	3.34053e-05	-0.262793	0.137	0.302	0.868169
OAS3	4.90009e-05	-0.263489	0.286	0.455	1
COX5A	1.54002e-06	-0.263599	0.776	0.916	0.0400237
SVIL	9.39171e-07	-0.263667	0.205	0.415	0.0244081
QSOX1	8.15556e-08	-0.26383	0.28	0.531	0.00211955
GCA	1.98127e-07	-0.263998	0.584	0.821	0.00514913
ABCA6	0.000133782	-0.264437	0.112	0.256	1
RAN	5.09904e-05	-0.26497	0.814	0.889	1
DDX60L	2.38906e-05	-0.26547	0.267	0.447	0.620893
SOAT1	2.59806e-05	-0.265613	0.466	0.641	0.675211
PARK7	1.73628e-07	-0.266265	0.789	0.897	0.00451242
HINT1	9.04863e-08	-0.26683	0.863	0.924	0.00235165
GLB1	2.05434e-06	-0.266862	0.528	0.73	0.0533903
SMCO4	2.32486e-06	-0.267232	0.516	0.715	0.0604208
TMSB10	4.4949e-15	-0.267682	1	1	1.16818e-10
MTATP6P1	8.40252e-08	-0.268123	0.925	0.966	0.00218373
EVI2B	1.53202e-06	-0.268491	0.733	0.889	0.0398157
IMMT	5.47228e-08	-0.268493	0.335	0.575	0.00142219
FKBP1A	9.24148e-08	-0.268743	0.776	0.912	0.00240177
ARHGDIB	4.21101e-11	-0.268988	1	1	1.0944e-06
PRR13	1.1045e-06	-0.26912	0.696	0.865	0.0287048
LAMP2	3.0784e-07	-0.26919	0.596	0.791	0.00800046
ABRACL	1.05631e-05	-0.269666	0.466	0.676	0.274525
NCKAP1L	5.39022e-08	-0.269705	0.497	0.737	0.00140087
WIPF1	2.54308e-07	-0.269941	0.72	0.899	0.00660921
DNMT1	7.95995e-07	-0.270203	0.665	0.853	0.0206871
HLA-DMA	1.22608e-09	-0.271475	1	0.995	3.18645e-05
NDUFA3	7.25161e-07	-0.271803	0.559	0.771	0.0188462
RNF130	7.97274e-07	-0.272386	0.826	0.853	0.0207204
OPN3	3.35596e-07	-0.272426	0.348	0.595	0.0087218
PKM	1.23684e-08	-0.272605	0.882	0.948	0.000321443
CTSS	4.20506e-08	-0.274878	0.957	0.98	0.00109285
KPNB1	3.63274e-06	-0.275484	0.54	0.762	0.0944112
C1orf54	0.00761045	-0.275534	0.391	0.489	1
RNF213	9.91302e-05	-0.276013	0.472	0.646	1
MDH1	8.25848e-08	-0.276134	0.652	0.848	0.0021463
CTSA	2.43792e-08	-0.276364	0.292	0.56	0.000633592
BCAP31	3.2503e-09	-0.276494	0.54	0.769	8.4472e-05
ANP32B	1.18676e-05	-0.276857	0.702	0.848	0.308427
CTSD	0.00526926	-0.277153	0.54	0.668	1
SELENOW	1.028e-07	-0.277406	0.72	0.857	0.00267166
MAP3K13	3.51896e-05	-0.277435	0.441	0.619	0.914543
TXNDC17	9.07439e-08	-0.278802	0.472	0.717	0.00235834
VCP	2.27687e-08	-0.279247	0.385	0.656	0.000591735
CD59	5.51566e-07	-0.279902	0.41	0.634	0.0143346
IGSF6	4.44095e-08	-0.280054	0.975	0.978	0.00115416
ALCAM	9.2461e-06	-0.280335	0.789	0.887	0.240297
TMSB4X	7.14324e-17	-0.281193	1	1	1.85646e-12
COX8A	2.12553e-07	-0.28163	0.807	0.909	0.00552404
ERH	2.65885e-08	-0.281834	0.696	0.862	0.000691009
IL2RG	1.45222e-06	-0.282129	0.54	0.771	0.0377416
UQCRQ	1.01468e-07	-0.282224	0.727	0.85	0.00263705
SPINT2	6.94991e-06	-0.282949	0.851	0.902	0.180621
SERF2	4.61756e-13	-0.283112	0.994	1	1.20006e-08
ATAD2	4.8782e-05	-0.283532	0.118	0.265	1
PDCD6	9.73351e-10	-0.284362	0.385	0.671	2.52964e-05
PPDPF	1.82415e-07	-0.284454	0.702	0.894	0.00474079
YWHAH	3.0849e-05	-0.284569	0.95	0.958	0.801734
RSAD2	2.02482e-05	-0.285804	0.093	0.265	0.52623
NDUFC2	2.12116e-10	-0.285865	0.348	0.666	5.51268e-06
SIVA1	2.8423e-06	-0.285962	0.491	0.705	0.0738684
TMPO	0.000502616	-0.286585	0.429	0.587	1
CD81	3.95237e-07	-0.28714	0.453	0.708	0.0102718
SPPL2A	1.12321e-07	-0.287256	0.41	0.649	0.00291911
MYL12A	5.36539e-09	-0.287547	0.975	0.983	0.000139441
P4HB	1.49341e-07	-0.287676	0.534	0.744	0.00388121
ENG	3.07598e-06	-0.287799	0.329	0.538	0.0799415
GSTO1	5.81137e-07	-0.287868	0.683	0.85	0.0151032
STARD7	4.8905e-08	-0.288006	0.41	0.663	0.00127099
DCAF7	2.22731e-10	-0.288282	0.261	0.572	5.78856e-06
LAMTOR1	8.73574e-09	-0.288715	0.807	0.912	0.000227033
RRM2	3.72425e-05	-0.289952	0.006	0.111	0.967896
MCM3	7.35935e-07	-0.290735	0.193	0.408	0.0191262
TPX2	8.0014e-06	-0.292057	0.043	0.189	0.207949
FAM96A	3.91078e-08	-0.292447	0.733	0.872	0.00101637
PSMB2	3.90323e-08	-0.292624	0.54	0.779	0.00101441
M6PR	1.82224e-09	-0.293217	0.534	0.794	4.73582e-05
A2M	7.33437e-05	-0.293251	0.354	0.555	1
TXN	1.21913e-05	-0.294749	0.671	0.828	0.316839
SMC2	3.32448e-05	-0.295162	0.199	0.369	0.864
CD52	0.00868254	-0.29611	0.87	0.912	1
ANP32E	4.30213e-05	-0.296183	0.429	0.587	1
COMMD4	4.17381e-09	-0.296666	0.23	0.506	0.000108473
PLBD1	3.02449e-07	-0.296876	0.571	0.764	0.00786035
FFAR4	6.61944e-09	-0.297683	0.143	0.388	0.000172033
PGD	3.85248e-09	-0.299275	0.335	0.627	0.000100122
MIF4GD	2.74661e-08	-0.299348	0.478	0.695	0.000713817
CALR	7.13319e-06	-0.299836	0.82	0.916	0.185384
CCR2	1.76087e-06	-0.30111	0.28	0.496	0.0457632
UQCR10	4.0169e-09	-0.302107	0.789	0.924	0.000104395
AP2S1	2.10439e-10	-0.302763	0.857	0.946	5.46909e-06
SLC44A1	6.15815e-09	-0.303115	0.242	0.528	0.000160044
PRCP	1.58111e-07	-0.303814	0.677	0.838	0.00410915
RPN2	1.05212e-09	-0.304753	0.689	0.889	2.73435e-05
KIAA0100	6.78878e-11	-0.305429	0.317	0.631	1.76434e-06
CSF2RB	1.90532e-06	-0.305927	0.261	0.464	0.0495173
CKS1B	7.01496e-07	-0.306689	0.099	0.287	0.0182312
TNFSF12	3.60721e-07	-0.308525	0.46	0.686	0.00937478
CD14	2.95356e-05	-0.308559	0.435	0.631	0.7676
SLA	4.17798e-07	-0.309601	0.621	0.784	0.0108582
TNFAIP8L2	6.57835e-09	-0.309623	0.391	0.666	0.000170965
LMNB1	7.28181e-07	-0.311227	0.311	0.516	0.0189247
RAB32	6.32339e-07	-0.311634	0.714	0.872	0.0164339
TRIM22	2.40833e-06	-0.311741	0.646	0.781	0.06259
ARPC2	3.24644e-13	-0.312716	0.994	0.995	8.43716e-09
MYDGF	4.02417e-09	-0.313381	0.547	0.771	0.000104584
CCND3	4.57999e-07	-0.313675	0.453	0.671	0.0119029
SMC3	5.05706e-08	-0.314947	0.41	0.639	0.00131428
EIF2AK2	8.72495e-07	-0.3154	0.516	0.73	0.0226753
OAS1	4.601e-05	-0.315776	0.261	0.45	1
CTSH	4.02908e-11	-0.315842	0.963	0.988	1.04712e-06
PLSCR1	2.81877e-07	-0.316239	0.776	0.877	0.0073257
ACTG1	2.81672e-10	-0.316483	0.994	0.998	7.32038e-06
ATP6V0E1	6.10146e-11	-0.316573	0.957	0.975	1.58571e-06
SLFN5	2.2892e-08	-0.317254	0.193	0.44	0.00059494
SPCS3	2.34438e-10	-0.317626	0.634	0.845	6.09282e-06
CALM2	1.5792e-09	-0.318255	0.938	0.978	4.10419e-05
HLA-DPA1	7.52628e-14	-0.319231	1	1	1.95601e-09
CLTC	1.2611e-09	-0.319759	0.484	0.749	3.27746e-05
UBE2C	5.69671e-05	-0.319818	0.019	0.13	1
STAT1	6.7489e-07	-0.320061	0.497	0.735	0.0175397
ANAPC11	1.23128e-08	-0.320467	0.652	0.823	0.000319999
FBP1	6.2001e-07	-0.320604	0.429	0.663	0.0161135
CORO1C	5.67126e-11	-0.321315	0.36	0.673	1.4739e-06
SHISA5	1.51219e-08	-0.32386	0.46	0.69	0.000393003
NDUFA2	7.53659e-09	-0.324282	0.602	0.821	0.000195868
IGKC	7.02481e-05	-0.32505	0.484	0.686	1
FAM105A	1.35287e-09	-0.325583	0.54	0.767	3.51597e-05
NDUFC1	9.36672e-12	-0.327532	0.366	0.688	2.43432e-07
F13A1	0.000203262	-0.328916	0.602	0.705	1
FN1	0.00409185	-0.3291	0.528	0.673	1
C12orf75	0.00271226	-0.329819	0.335	0.457	1
CD2	0.00123403	-0.330365	0.335	0.459	1
CD74	1.80608e-22	-0.330823	1	1	4.69382e-18
RBX1	1.0699e-10	-0.331005	0.708	0.889	2.78056e-06
SOCS1	8.43695e-09	-0.334219	0.36	0.644	0.000219268
ATP6V0B	1.90179e-11	-0.337099	0.845	0.929	4.94256e-07
HERC5	1.33193e-06	-0.337214	0.093	0.275	0.0346156
PFN1	6.16854e-16	-0.337783	1	1	1.60314e-11
SUMO2	7.46635e-13	-0.33817	0.832	0.929	1.94043e-08
AKR1B1	1.5716e-09	-0.33872	0.522	0.774	4.08442e-05
CHCHD2	1.09598e-11	-0.339127	0.932	0.951	2.84833e-07
ALDH2	4.31562e-08	-0.339606	0.876	0.924	0.00112159
EPSTI1	1.98948e-05	-0.340064	0.509	0.666	0.517046
BST2	1.16141e-09	-0.341414	0.677	0.85	3.01839e-05
S100A11	1.56238e-15	-0.341641	1	1	4.06047e-11
PSAP	1.01956e-07	-0.344122	0.944	0.978	0.00264974
ADAR	2.09723e-11	-0.344228	0.435	0.72	5.45049e-07
PSMB8	2.72283e-09	-0.344708	0.733	0.882	7.07638e-05
IFI16	9.28784e-10	-0.345084	0.839	0.946	2.41382e-05
TMEM50A	6.51038e-11	-0.345167	0.702	0.855	1.69198e-06
FGL2	1.24097e-10	-0.345459	0.963	0.985	3.22516e-06
PARP1	3.28541e-11	-0.345502	0.441	0.74	8.53846e-07
ARL6IP5	5.63597e-11	-0.345771	0.907	0.973	1.46473e-06
OSTC	3.29077e-09	-0.34582	0.658	0.818	8.55239e-05
TMBIM6	1.52665e-15	-0.349038	0.975	0.985	3.9676e-11
AXL	3.39058e-08	-0.350206	0.516	0.71	0.000881178
NUCKS1	8.31926e-08	-0.353975	0.826	0.941	0.00216209
IFI44	3.05077e-08	-0.354068	0.335	0.587	0.000792865
CD1C	0.00645365	-0.354964	0.77	0.774	1
HLA-DQA1	1.22281e-10	-0.355723	0.994	0.998	3.17796e-06
PARP9	2.33379e-10	-0.355763	0.441	0.715	6.0653e-06
CD63	3.36849e-10	-0.356132	0.894	0.961	8.75437e-06
HIST1H4C	0.0111902	-0.357254	0.441	0.572	1
DDX60	3.99418e-08	-0.358566	0.286	0.526	0.00103805
NUB1	7.00345e-05	-0.359604	0.571	0.722	1
PPP1R14A	8.03007e-07	-0.363351	0.261	0.489	0.0208694
PCNA	7.07073e-05	-0.365022	0.292	0.457	1
RAB31	3.45809e-12	-0.367428	0.894	0.941	8.98723e-08
MT-ND5	7.33323e-18	-0.36919	1	1	1.90583e-13
HLA-DQB2	0.829801	-0.373939	0.23	0.226	1
CENPF	0.000910325	-0.377452	0.106	0.226	1
CSTA	6.30052e-06	-0.381876	0.677	0.769	0.163744
MS4A4A	1.41301e-09	-0.381915	0.224	0.509	3.67227e-05
JAML	4.10468e-09	-0.3823	0.832	0.929	0.000106677
OAS2	1.50945e-08	-0.382755	0.329	0.577	0.00039229
FPR1	1.59116e-07	-0.384705	0.739	0.872	0.00413527
PKIB	1.80922e-08	-0.385742	0.745	0.867	0.000470199
APOL4	1.30878e-11	-0.386131	0.236	0.545	3.40138e-07
CXCR2	1.504e-10	-0.392869	0.056	0.312	3.90875e-06
DYNLT1	4.84571e-12	-0.393533	0.292	0.612	1.25935e-07
IFIT2	0.166373	-0.393735	0.317	0.376	1
GNPTAB	3.85734e-10	-0.397441	0.447	0.713	1.00248e-05
ANXA11	2.64556e-12	-0.397961	0.64	0.799	6.87553e-08
TXNIP	2.92321e-09	-0.399775	0.957	0.985	7.59712e-05
VAMP8	7.90864e-15	-0.402563	0.888	0.946	2.05538e-10
MLEC	3.12031e-14	-0.406856	0.385	0.715	8.10937e-10
APOE	1.932e-05	-0.407454	0.174	0.356	0.502109
SAMHD1	5.10964e-17	-0.408454	0.932	0.99	1.32794e-12
SLC18A2	4.37435e-07	-0.408648	0.05	0.224	0.0113685
CTSB	2.2093e-14	-0.408649	0.944	0.988	5.74174e-10
FCGBP	0.0193727	-0.411867	0.174	0.265	1
PPT1	2.01922e-15	-0.423843	0.876	0.975	5.24775e-11
HIST1H1D	2.13505e-05	-0.425211	0.211	0.396	0.554878
TM9SF2	1.21365e-16	-0.426136	0.634	0.877	3.15416e-12
H2AFV	2.77568e-11	-0.42619	0.727	0.902	7.2137e-07
H2AFZ	0.00104169	-0.430536	0.82	0.872	1
CPVL	3.12742e-07	-0.432054	0.789	0.87	0.00812786
MRC1	0.00134255	-0.437665	0.466	0.582	1
SAMD9	6.90059e-10	-0.439181	0.317	0.612	1.7934e-05
CXCL10	0.710237	-0.441307	0.124	0.138	1
CST7	0.000162821	-0.442105	0.323	0.482	1
NUSAP1	0.0001162	-0.442486	0.118	0.263	1
MS4A6A	2.45759e-10	-0.444423	0.814	0.909	6.38704e-06
ARPC5	6.75832e-18	-0.447021	0.894	0.961	1.75642e-13
HMGB1	8.61992e-08	-0.449007	0.925	0.973	0.00224023
ALOX5AP	6.23765e-11	-0.455661	0.95	0.966	1.6211e-06
TK1	1.00508e-05	-0.46253	0.05	0.192	0.261209
JPT1	2.3782e-11	-0.463833	0.54	0.781	6.1807e-07
DUT	3.84615e-07	-0.470756	0.522	0.705	0.00999575
SYNGR2	2.91948e-11	-0.471159	0.876	0.953	7.58743e-07
GRN	1.56523e-18	-0.471364	0.963	0.995	4.06786e-14
IFITM3	4.77629e-07	-0.473886	0.913	0.931	0.0124131
IFI44L	3.10457e-07	-0.474165	0.298	0.516	0.00806846
SAMD9L	3.91193e-12	-0.475257	0.547	0.803	1.01667e-07
ATP6AP2	4.00287e-15	-0.475839	0.783	0.892	1.04031e-10
NAAA	4.75696e-11	-0.476266	0.472	0.74	1.23629e-06
FPR3	2.50536e-10	-0.481909	0.484	0.727	6.51118e-06
MT-TP	7.79919e-21	-0.484036	0.068	0.494	2.02693e-16
TYMS	6.48332e-06	-0.492357	0.043	0.187	0.168495
IL7R	1.59193e-06	-0.496503	0.099	0.283	0.0413726
GPR82	8.54619e-11	-0.514697	0.248	0.531	2.22107e-06
CISH	2.91503e-13	-0.520598	0.366	0.668	7.57588e-09
PCLAF	7.24782e-07	-0.533469	0.037	0.199	0.0188364
GSN	2.4456e-19	-0.534926	0.95	0.98	6.35586e-15
HMGB2	0.0122565	-0.536224	0.64	0.74	1
CST3	5.83112e-14	-0.541429	1	0.998	1.51545e-09
CTSC	1.20959e-12	-0.541943	0.938	0.946	3.14361e-08
CD1E	7.30423e-07	-0.543702	0.547	0.708	0.018983
PTAFR	3.35135e-13	-0.544828	0.727	0.853	8.70982e-09
LYZ	3.40367e-07	-0.553332	0.988	0.985	0.00884581
HIST1H1E	1.8997e-11	-0.579035	0.236	0.521	4.93713e-07
C1QA	6.48792e-09	-0.593469	0.565	0.754	0.000168615
CD1B	2.18875e-05	-0.603259	0.211	0.378	0.568833
CD207	0.133544	-0.606413	0.329	0.359	1
LY6E	3.80736e-14	-0.610087	0.578	0.828	9.89495e-10
TOP2A	2.60054e-05	-0.614019	0.043	0.177	0.675854
TUBA1B	2.77444e-11	-0.614794	0.975	0.973	7.2105e-07
TNFSF10	7.23235e-08	-0.619903	0.447	0.658	0.00187962
MX1	4.99854e-09	-0.621752	0.528	0.744	0.000129907
WFDC21P	1.70394e-06	-0.630048	0.404	0.627	0.0442836
ISG15	1.33675e-05	-0.659789	0.578	0.713	0.347407
IFIT3	2.28557e-08	-0.672365	0.18	0.435	0.000593998
CCL17	0.00175066	-0.687612	0.41	0.545	1
MKI67	2.65082e-05	-0.694037	0.05	0.184	0.688922
CCL22	0.0105167	-0.70765	0.112	0.201	1
IFIT1	9.9996e-06	-0.710699	0.168	0.346	0.25988
TMEM176A	1.50494e-10	-0.713531	0.261	0.523	3.91119e-06
HLA-DRB5	2.17077e-22	-0.730928	0.615	0.86	5.6416e-18
LTB	3.87998e-09	-0.740011	0.422	0.678	0.000100837
STMN1	0.00175011	-0.770202	0.404	0.531	1
MT-TE	3.11227e-26	-0.770579	0.18	0.656	8.08848e-22
TUBB	2.34549e-11	-0.774123	0.671	0.865	6.09569e-07
C1QB	1.27198e-09	-0.782629	0.484	0.705	3.30575e-05
IFI6	8.59666e-17	-0.803926	0.609	0.877	2.23418e-12
IFI27	0.000640984	-0.831413	0.161	0.29	1
TMEM176B	4.27269e-14	-0.899911	0.354	0.636	1.11043e-09
CD1A	2.85843e-13	-0.937886	0.193	0.518	7.42877e-09
S100B	9.32195e-06	-0.988246	0.41	0.582	0.242268
C1QC	1.52338e-12	-0.990218	0.478	0.713	3.95911e-08

## Sheet: P21120201.clustercDC2_2_diffgen
gene_id	p_val	avg_logFC	pct.1	pct.2	p_val_adj
CXCL10	0.766129	1.16601	0.136	0.133	1
IFIT1	3.22419e-06	1.00354	0.416	0.251	0.0837935
IFIT3	3.0982e-05	0.774754	0.474	0.321	0.805192
IFIT2	0.0156722	0.77394	0.416	0.338	1
ISG15	0.00046722	0.725488	0.747	0.647	1
MRC1	2.74509e-14	0.662111	0.76	0.471	7.13421e-10
TNFSF10	0.00223991	0.649796	0.675	0.57	1
MX1	7.92501e-05	0.621223	0.766	0.652	1
CCL17	2.93163e-05	0.613664	0.623	0.464	0.761902
IFITM3	1.80241e-10	0.561566	0.948	0.918	4.68429e-06
RSAD2	5.88533e-06	0.556509	0.338	0.171	0.152954
FPR3	9.86221e-15	0.537516	0.838	0.592	2.56309e-10
IFI27	0.0297464	0.500387	0.305	0.234	1
IFI6	1.10763e-05	0.497332	0.896	0.766	0.287863
C1QA	8.69779e-08	0.494797	0.825	0.655	0.00226047
HMOX1	1.82662e-06	0.491617	0.656	0.435	0.0474721
TMEM176B	6.37704e-09	0.486585	0.721	0.495	0.000165733
C1QC	1.36463e-05	0.479752	0.773	0.599	0.354655
IFI44L	9.59293e-06	0.465374	0.565	0.413	0.249311
RNF213	5.4837e-10	0.456612	0.76	0.536	1.42516e-05
CD14	6.80398e-09	0.45373	0.74	0.514	0.000176829
FCN1	0.000111226	0.448131	0.273	0.14	1
F13A1	2.80816e-08	0.44617	0.779	0.638	0.000729813
C1QB	4.0478e-06	0.445817	0.766	0.597	0.105198
LY6E	7.22847e-07	0.444832	0.831	0.729	0.0187861
CTSC	1.09423e-09	0.439669	0.968	0.935	2.8438e-05
FCGR2B	2.14985e-12	0.431415	0.929	0.785	5.58724e-08
SAMD9	4.38163e-05	0.425391	0.636	0.488	1
OAS1	4.78971e-06	0.420436	0.526	0.348	0.12448
TMEM176A	2.89252e-06	0.417702	0.584	0.399	0.0751736
SERPINA1	2.01674e-13	0.407949	0.987	0.867	5.24129e-09
CLEC10A	1.14178e-08	0.401392	0.779	0.577	0.000296738
A2M	1.24667e-08	0.397776	0.688	0.428	0.000323997
CLEC5A	7.76724e-09	0.38675	0.799	0.58	0.000201863
IGLC2	0.00632441	0.383788	0.234	0.14	1
HLA-DRB5	3.39645e-11	0.376783	0.857	0.766	8.82704e-07
ID3	0.0349149	0.375716	0.526	0.454	1
MT2A	0.0528718	0.368615	0.643	0.638	1
MNDA	4.88067e-12	0.362328	0.981	0.961	1.26844e-07
PILRA	5.12151e-07	0.353282	0.519	0.307	0.0133103
FTL	1.26744e-09	0.351331	1	1	3.29395e-05
DDX58	0.0180543	0.350768	0.383	0.3	1
PTAFR	3.41707e-09	0.350041	0.89	0.79	8.88062e-05
CD9	6.43455e-07	0.34883	0.74	0.541	0.0167228
STAT1	5.67867e-05	0.345054	0.747	0.638	1
LPAR6	1.81873e-07	0.343134	0.851	0.722	0.00472669
TNFSF13B	2.25425e-06	0.341979	0.786	0.63	0.0585858
PSAP	5.65853e-12	0.341977	1	0.957	1.4706e-07
BLVRA	2.21065e-09	0.335284	0.597	0.377	5.74525e-05
ATP6AP2	1.35402e-08	0.333794	0.909	0.843	0.000351895
SAMD9L	5.69142e-05	0.330506	0.792	0.708	1
FPR1	2.61913e-06	0.327725	0.916	0.804	0.0680685
MX2	0.00133228	0.322282	0.5	0.394	1
CD63	2.52347e-11	0.321586	0.974	0.93	6.55826e-07
TFEC	1.38173e-08	0.320671	0.649	0.423	0.000359097
SLFN5	7.00572e-07	0.319922	0.526	0.312	0.0182072
CTSB	2.74279e-12	0.319564	0.994	0.969	7.12824e-08
HERC5	0.00733015	0.318336	0.286	0.2	1
IFIH1	0.0112462	0.315242	0.552	0.464	1
C3	0.00961752	0.314154	0.623	0.527	1
CD163	3.28473e-05	0.312214	0.487	0.326	0.853668
GIMAP4	8.32806e-07	0.309888	0.571	0.343	0.0216438
HSPA5	0.0114904	0.307598	0.903	0.87	1
CEBPB	0.000295853	0.302147	0.734	0.635	1
IFI44	0.0163262	0.301527	0.571	0.495	1
C3AR1	1.92303e-05	0.301399	0.545	0.357	0.499775
PLSCR1	2.4953e-06	0.301094	0.903	0.829	0.0648502
CSF1R	2.63716e-07	0.299921	0.896	0.804	0.00685372
CD86	8.51326e-07	0.299457	0.935	0.862	0.0221251
TREM2	2.97544e-06	0.296411	0.669	0.447	0.0773286
CLEC4F	1.06469e-05	0.295516	0.409	0.232	0.276701
RAB31	1.09087e-08	0.295288	0.955	0.918	0.000283507
HLA-DMA	9.09621e-13	0.29331	1	0.995	2.36401e-08
FCER1G	7.53872e-12	0.292723	1	0.986	1.95924e-07
GLRX	1.445e-06	0.292153	0.864	0.804	0.0375541
IFI16	5.73996e-07	0.289141	0.955	0.901	0.0149176
ITM2B	2.96003e-08	0.285092	1	0.983	0.000769282
CCR1	8.58354e-06	0.282186	0.474	0.3	0.223078
OAS2	0.000629542	0.2799	0.597	0.473	1
PARP9	3.25626e-05	0.277158	0.734	0.601	0.84627
S100A11	2.77208e-12	0.274328	1	1	7.20435e-08
C15orf48	0.541017	0.273547	0.396	0.377	1
DDX60	0.00490954	0.269763	0.532	0.43	1
SLCO2B1	1.2825e-07	0.267301	0.357	0.159	0.00333309
HLA-DRB1	6.40311e-15	0.266752	1	1	1.6641e-10
BST2	2.74684e-05	0.266459	0.857	0.78	0.713877
TYMP	0.00016201	0.266172	0.838	0.778	1
EPSTI1	0.00142265	0.265241	0.675	0.601	1
FCGR2A	3.77717e-06	0.2631	0.974	0.853	0.0981649
SORL1	4.54922e-06	0.262953	0.643	0.449	0.11823
CCR2	6.85646e-08	0.262734	0.617	0.367	0.00178192
ANXA2	1.47377e-05	0.262017	0.981	0.971	0.383017
UBE2L6	0.000768383	0.260288	0.773	0.708	1
MYC	0.00146479	0.259908	0.429	0.307	1
LAP3	6.68556e-05	0.259856	0.844	0.783	1
CD44	0.000383748	0.258518	0.831	0.804	1
SMIM29	1.20027e-05	0.258332	0.61	0.432	0.311939
SPPL2A	2.66789e-05	0.258021	0.701	0.536	0.693357
ENG	6.82346e-06	0.257923	0.604	0.432	0.177335
CTSA	2.32478e-07	0.256667	0.649	0.423	0.00604186
SCIMP	0.000258735	0.256567	0.662	0.529	1
CISH	0.000174474	0.255953	0.688	0.543	1
DDX60L	0.000453265	0.255221	0.494	0.36	1
XAF1	0.000181065	0.254684	0.844	0.729	1
CTSS	8.31892e-08	0.253635	0.994	0.966	0.002162
TMEM51	9.05468e-06	0.250433	0.597	0.432	0.235322
ATP2B1-AS1	0.000368719	-0.250305	0.253	0.403	1
JUND	0.000208598	-0.252223	0.442	0.582	1
REL	0.0390314	-0.253323	0.701	0.739	1
PHLDA1	0.228711	-0.254206	0.286	0.316	1
IL1A	4.90103e-05	-0.256102	0.013	0.126	1
HLA-DQB2	0.290476	-0.257706	0.201	0.237	1
NEDD9	0.00939785	-0.263132	0.24	0.343	1
ATAD2	0.00152456	-0.267262	0.143	0.254	1
DNAJB4	0.00156387	-0.269002	0.273	0.408	1
JMJD1C	0.344124	-0.270915	0.76	0.746	1
PTTG1	0.00026066	-0.272531	0.182	0.324	1
HCAR3	0.00481253	-0.272765	0.039	0.116	1
TMPO	0.0549488	-0.272994	0.532	0.546	1
C12orf75	0.0331093	-0.27342	0.37	0.442	1
HMGB1	0.0528341	-0.273645	0.961	0.959	1
KLF2	0.000172311	-0.276106	0.182	0.333	1
JUNB	0.0118574	-0.277016	0.961	0.952	1
HIST1H1B	0.000558283	-0.277479	0.026	0.121	1
SLC38A2	0.000326051	-0.277659	0.649	0.722	1
FAM111B	2.16717e-06	-0.279236	0.006	0.145	0.0563225
TPX2	0.000137661	-0.280752	0.058	0.181	1
CCL22	0.0727539	-0.282031	0.227	0.157	1
ZFAND5	0.0201322	-0.28267	0.864	0.865	1
B3GNT5	0.288471	-0.282806	0.708	0.705	1
CA2	0.105677	-0.283495	0.188	0.244	1
SOCS3	0.0108051	-0.284618	0.377	0.457	1
HIST1H1D	0.228162	-0.29033	0.318	0.353	1
RRM2	1.66648e-05	-0.290799	0	0.111	0.433102
DDIT3	0.000245608	-0.29549	0.227	0.382	1
MIR155HG	2.06936e-05	-0.295746	0.058	0.208	0.537807
HIST1H1C	0.0173716	-0.296212	0.364	0.449	1
ARL4A	0.00524243	-0.300161	0.253	0.355	1
PRDM1	0.0433751	-0.300915	0.266	0.336	1
SRSF3	2.33332e-06	-0.301578	0.916	0.915	0.0606407
MT-RNR1	2.61937e-06	-0.308596	1	1	0.0680749
IFRD1	6.59991e-05	-0.310496	0.214	0.374	1
DUSP5	0.000258972	-0.313253	0.208	0.377	1
EZH2	0.000497039	-0.313615	0.182	0.314	1
RHOB	0.0112509	-0.313888	0.442	0.512	1
CD55	0.00695162	-0.316129	0.519	0.575	1
CDK1	3.87283e-05	-0.318725	0.052	0.186	1
EIF5	3.18409e-06	-0.3204	0.721	0.843	0.0827514
NLRP3	0.894949	-0.322929	0.468	0.442	1
IER5	3.99978e-05	-0.324047	0.552	0.698	1
CHORDC1	0.000319814	-0.325041	0.422	0.563	1
FCGBP	0.0896399	-0.325107	0.195	0.256	1
CD1A	0.712013	-0.325741	0.474	0.408	1
SMC4	0.0217474	-0.328132	0.344	0.396	1
TAGAP	0.0250188	-0.329579	0.597	0.63	1
TIPARP	0.0109421	-0.330838	0.455	0.541	1
SNAI1	6.83711e-06	-0.331204	0.071	0.237	0.17769
EZR	4.29377e-07	-0.337233	0.643	0.79	0.0111591
TUBA1C	0.00152767	-0.338916	0.61	0.686	1
HSPB1	0.0853306	-0.340161	0.896	0.865	1
DNAJA4	6.03843e-05	-0.343982	0.104	0.254	1
UBE2C	7.13163e-06	-0.34537	0.006	0.133	0.185344
BRD2	3.76139e-05	-0.348357	0.708	0.819	0.977549
BIRC3	3.32189e-05	-0.353441	0.214	0.382	0.863326
CSRNP1	2.44028e-05	-0.353624	0.234	0.399	0.634205
IER2	0.103402	-0.356568	0.909	0.877	1
ZNF331	0.114259	-0.362129	0.175	0.232	1
CXCR4	0.00321354	-0.365893	0.838	0.867	1
UBC	0.000717797	-0.367515	1	0.99	1
CCL5	0.211947	-0.367717	0.149	0.188	1
BHLHE40	0.00268367	-0.368666	0.708	0.816	1
SLAMF7	0.000260368	-0.370651	0.11	0.244	1
ARL5B	9.10443e-05	-0.370882	0.156	0.3	1
CLK1	0.000626225	-0.372089	0.604	0.671	1
DNAJA1	0.0011549	-0.376398	0.903	0.915	1
HIST1H4C	0.149562	-0.379847	0.506	0.546	1
CENPF	0.00132787	-0.39045	0.11	0.222	1
MAFF	1.79234e-06	-0.39499	0.143	0.329	0.0465812
FOS	0.134368	-0.395076	0.994	0.973	1
TUBB4B	3.3785e-05	-0.403707	0.422	0.572	0.878037
RGS2	0.00492705	-0.407256	0.747	0.833	1
UBB	1.71824e-06	-0.412902	0.994	1	0.0446555
PDE4B	0.00350217	-0.412979	0.364	0.464	1
INSIG1	0.00171793	-0.418239	0.273	0.399	1
S100B	0.993948	-0.418933	0.565	0.522	1
CD207	0.0574294	-0.423166	0.292	0.372	1
SRSF7	0.00021081	-0.423625	0.896	0.911	1
MT-RNR2	2.89307e-10	-0.425161	1	1	7.51881e-06
ICAM1	0.00496368	-0.431631	0.526	0.592	1
RASGEF1B	0.000360303	-0.434591	0.26	0.396	1
CCL2	0.0661466	-0.435785	0.221	0.283	1
KLF4	1.06891e-05	-0.442028	0.539	0.657	0.277799
GPR183	0.0631781	-0.442823	0.896	0.894	1
HSP90AB1	0.0018112	-0.444116	1	0.993	1
TK1	8.09281e-05	-0.444465	0.058	0.186	1
PTGS2	4.40474e-05	-0.447127	0.182	0.35	1
PTGER4	0.000154217	-0.449942	0.448	0.56	1
SOD2	5.0796e-05	-0.453696	0.357	0.488	1
TUBB	0.351007	-0.456533	0.825	0.804	1
TYMS	7.60462e-07	-0.459678	0.026	0.191	0.0197636
CDKN1A	0.000100246	-0.464533	0.604	0.705	1
PLIN2	0.144112	-0.467488	0.675	0.703	1
H2AFZ	0.00163908	-0.470903	0.851	0.86	1
PHACTR1	1.92524e-07	-0.47306	0.416	0.618	0.00500352
NAMPT	8.59397e-05	-0.477757	0.442	0.582	1
RIPK2	0.0037804	-0.480257	0.487	0.546	1
EGR1	0.0229722	-0.480482	0.773	0.78	1
DUSP1	0.00416108	-0.483889	0.948	0.935	1
PPP1R15B	4.75441e-06	-0.486437	0.39	0.551	0.123562
CKS2	6.65553e-07	-0.498988	0.299	0.502	0.0172971
EIF4A3	2.91099e-05	-0.500302	0.643	0.72	0.756537
JUN	4.21624e-05	-0.500776	0.987	0.981	1
NUSAP1	1.91181e-05	-0.504466	0.11	0.263	0.496861
ZFP36	0.00422198	-0.509099	0.961	0.971	1
TWISTNB	0.85947	-0.509525	0.5	0.464	1
AREG	0.0113663	-0.519388	0.305	0.403	1
RGCC	0.00454858	-0.526048	0.357	0.464	1
PCLAF	7.11337e-07	-0.528676	0.032	0.198	0.0184869
ZFAND2A	0.00776564	-0.53793	0.214	0.302	1
GADD45B	0.000139099	-0.538346	0.792	0.821	1
HMGB2	0.0249417	-0.54774	0.701	0.715	1
PLEK	7.58824e-09	-0.550114	0.903	0.942	0.000197211
CCNL1	6.41222e-07	-0.551115	0.812	0.838	0.0166647
IER3	0.0139253	-0.554694	0.857	0.833	1
NFKBIA	1.03698e-05	-0.558965	1	0.995	0.269501
LTB	0.331014	-0.577324	0.643	0.592	1
CD69	0.0148978	-0.579898	0.617	0.693	1
HSPE1	2.99846e-07	-0.580093	0.786	0.86	0.00779271
HSPA1B	6.47695e-09	-0.582051	0.513	0.734	0.000168329
KLF6	0.0166037	-0.598495	0.968	0.937	1
HSPA6	0.60423	-0.5998	0.312	0.307	1
MKI67	2.6867e-06	-0.602084	0.032	0.188	0.0698247
TOP2A	0.000160689	-0.61829	0.052	0.171	1
TNF	0.000520786	-0.624754	0.292	0.435	1
PMAIP1	1.84815e-05	-0.637196	0.338	0.473	0.480316
SPP1	0.0706065	-0.658273	0.175	0.234	1
CXCL3	0.133475	-0.675437	0.065	0.104	1
HSPD1	1.59822e-07	-0.690689	0.818	0.911	0.0041536
NR4A1	3.3769e-08	-0.698648	0.416	0.614	0.000877623
STMN1	0.0413982	-0.708712	0.487	0.498	1
NFKBIZ	1.96075e-08	-0.746916	0.331	0.553	0.000509579
HSP90AA1	5.7393e-08	-0.748244	1	0.998	0.00149159
BCL2A1	3.84155e-07	-0.789933	0.481	0.626	0.00998381
HSPA1A	5.60994e-07	-0.793022	0.851	0.889	0.0145797
BAG3	2.01775e-05	-0.799161	0.156	0.324	0.524394
NR4A3	9.65343e-08	-0.814593	0.188	0.406	0.00250883
DUSP2	8.13553e-07	-0.853029	0.273	0.452	0.0211434
HSPH1	1.4405e-05	-0.855565	0.76	0.778	0.374371
G0S2	0.00143796	-0.868652	0.143	0.254	1
CCL4L2	1.14749e-05	-0.889462	0.506	0.667	0.29822
CD83	7.88066e-07	-0.896758	0.532	0.657	0.0204811
TNFAIP3	1.46473e-09	-0.902459	0.643	0.778	3.80669e-05
DNAJB1	2.81814e-06	-0.906713	0.753	0.802	0.0732407
PPP1R15A	6.58995e-10	-0.911933	0.526	0.691	1.71266e-05
NR4A2	2.64888e-06	-0.92149	0.279	0.442	0.0688418
FOSB	2.3995e-09	-0.985538	0.552	0.713	6.23607e-05
CCL3	0.000267597	-1.01369	0.565	0.643	1
CCL3L1	2.54062e-06	-1.06585	0.487	0.621	0.0660283
CXCL2	8.69486e-06	-1.0685	0.123	0.292	0.225971
CXCL8	1.07184e-08	-1.06914	0.338	0.575	0.00027856
CCL4	0.00235736	-1.15076	0.571	0.635	1
ATF3	6.52601e-10	-1.28321	0.357	0.58	1.69605e-05
IL1B	2.98893e-05	-1.37275	0.649	0.688	0.776794

## Sheet: P21120201.clustercDC2_3_diffgen
gene_id	p_val	avg_logFC	pct.1	pct.2	p_val_adj
LTB	9.87038e-06	0.702396	0.75	0.585	0.256521
LGALS2	9.01654e-08	0.631003	0.736	0.542	0.00234331
CPVL	0.0992204	0.539297	0.778	0.857	1
IDO1	9.73877e-06	0.497504	0.153	0.034	0.253101
NAPSB	7.39562e-07	0.486574	1	0.952	0.0192205
CFP	1.21352e-07	0.484442	0.472	0.216	0.00315383
CPNE3	0.0672528	0.458239	0.569	0.542	1
DNASE1L3	0.0213886	0.400586	0.111	0.048	1
CD52	0.00015365	0.393703	0.903	0.899	1
MED13L	0.0019623	0.377077	0.625	0.544	1
RIPOR2	3.35348e-07	0.374469	0.472	0.236	0.00871535
LIMD2	6.51214e-06	0.374142	0.861	0.736	0.169244
IFI27	0.987163	0.368338	0.236	0.256	1
CST3	0.000606853	0.367579	0.986	1	1
C1orf54	0.0120027	0.359797	0.278	0.488	1
VAV3	0.0113414	0.357224	0.319	0.226	1
FLT3	1.40745e-08	0.35291	0.417	0.155	0.000365782
CCL17	0.297273	0.352062	0.5	0.508	1
TAGLN2	0.000152339	0.342802	0.931	0.891	1
GSTP1	2.30169e-06	0.339617	0.986	0.984	0.0598186
IFITM2	0.000531176	0.337552	0.931	0.903	1
ACTG1	5.19297e-05	0.331239	1	0.996	1
CADM1	0.0174926	0.328432	0.194	0.111	1
NAAA	0.0679726	0.327923	0.653	0.665	1
CD1E	0.140944	0.32319	0.694	0.657	1
RPL26	3.12985e-07	0.320878	0.986	0.96	0.00813416
PTPRE	0.0398596	0.316728	0.583	0.55	1
ABRACL	0.00157826	0.310069	0.653	0.611	1
CLNK	2.41091e-05	0.308314	0.208	0.065	0.62657
SAMHD1	3.71329e-07	0.302838	1	0.97	0.00965048
NKG7	0.0264931	0.302431	0.167	0.091	1
RPL6	4.56227e-06	0.302102	0.986	0.972	0.118569
RPL8	5.90804e-08	0.301622	0.986	1	0.00153544
TBCA	0.00190936	0.294591	0.778	0.724	1
RPL18A	1.58738e-07	0.293544	0.986	0.996	0.00412544
AHNAK	0.0304355	0.29316	0.75	0.764	1
ZFC3H1	0.00269596	0.29263	0.528	0.415	1
CORO1A	0.00174026	0.291178	0.847	0.798	1
MPEG1	0.390866	0.289235	0.319	0.282	1
CD79B	0.298356	0.288325	0.153	0.121	1
MRPS34	0.0149226	0.287881	0.528	0.47	1
SLAMF7	0.799793	0.287732	0.208	0.208	1
PDCD4	0.00199467	0.286787	0.681	0.577	1
RPL21	4.87473e-07	0.285607	1	1	0.0126689
EXOSC5	0.0157491	0.284515	0.403	0.321	1
CYB5R3	0.086832	0.283831	0.597	0.591	1
RPL13	3.10704e-08	0.283588	1	1	0.000807488
CYLD	0.000397581	0.281793	0.694	0.56	1
SPINT2	0.00453323	0.281399	0.903	0.885	1
PPP1R14A	0.00412745	0.279661	0.542	0.407	1
LSP1	0.000718171	0.279454	0.944	0.931	1
NMI	0.00152585	0.279098	0.764	0.663	1
SMIM26	0.000898429	0.278192	0.694	0.615	1
RPS12	0.000105614	0.277846	1	0.998	1
SELL	0.00252618	0.277708	0.444	0.302	1
SLC25A6	0.000146166	0.276754	0.958	0.964	1
EEF1B2	0.0155403	0.275003	1	0.982	1
RASSF2	0.01328	0.274738	0.681	0.605	1
BTLA	0.000303086	0.274437	0.236	0.099	1
SMDT1	0.0008848	0.27375	0.847	0.774	1
GCA	0.0015308	0.273553	0.806	0.746	1
RNASE6	0.0713426	0.273275	0.861	0.871	1
RPS28	9.04211e-09	0.272519	0.986	0.988	0.000234995
SUSD3	0.119141	0.272258	0.528	0.494	1
COX7C	1.09451e-05	0.271417	0.944	0.98	0.284451
2022-09-09	0.000780197	0.270335	0.528	0.385	1
IL2RG	0.000236088	0.270172	0.806	0.692	1
WDFY4	0.00524155	0.269023	0.292	0.171	1
RPL14	1.69133e-06	0.267167	0.986	0.996	0.043956
GSTM4	0.00465486	0.265504	0.403	0.286	1
ARHGAP30	0.00137574	0.265375	0.694	0.637	1
AL138899.1	0.383141	0.265037	0.306	0.294	1
RPS9	0.000147588	0.264314	1	1	1
RNF44	0.00367855	0.264059	0.486	0.369	1
TAP1	0.090483	0.261699	0.569	0.593	1
RPS5	2.4842e-05	0.261509	1	0.978	0.645618
RPS11	7.14218e-06	0.260688	1	1	0.185618
RPL23A	9.37957e-06	0.259972	0.986	0.998	0.243766
IL16	0.000184967	0.258665	0.736	0.585	1
RACK1	2.18297e-06	0.258659	0.986	0.992	0.0567331
UFL1	0.0104747	0.25852	0.597	0.514	1
RPL31	8.48464e-09	0.257565	1	1	0.000220507
RPL18	5.3226e-06	0.257184	1	1	0.138329
CSF2RA	0.00582808	0.256599	0.833	0.784	1
SRP72	0.00115437	0.254282	0.764	0.692	1
P2RY14	0.0149863	0.253172	0.625	0.577	1
SUB1	0.0215343	0.252033	0.917	0.933	1
COTL1	0.267305	0.251654	0.958	0.988	1
RPL36	1.24807e-07	0.2509	0.986	0.998	0.00324362
SNHG5	0.000835272	0.250672	0.917	0.927	1
ERCC1	0.0206192	0.250617	0.667	0.605	1
RPS7	5.78873e-07	0.250352	1	0.992	0.0150443
ETF1	5.30182e-05	-0.250088	0.278	0.593	1
SLC7A7	0.000115815	-0.250337	0.194	0.448	1
PHACTR1	0.0206957	-0.250473	0.444	0.581	1
CD207	0.582473	-0.25054	0.333	0.353	1
HNRNPU	0.0428633	-0.252427	0.875	0.927	1
SLFN11	0.000360398	-0.252821	0.194	0.427	1
MS4A7	0.000111459	-0.253622	0.458	0.772	1
UBL3	0.000509669	-0.253779	0.514	0.738	1
CHORDC1	4.05386e-05	-0.253917	0.264	0.562	1
TFRC	0.000394334	-0.254391	0.069	0.266	1
S100A11	2.25788e-05	-0.255249	1	1	0.586801
IL4I1	0.0101101	-0.255777	0.042	0.153	1
CAPG	0.000254815	-0.256251	0.917	0.956	1
TGFBR1	6.291e-05	-0.256672	0.153	0.419	1
BRD2	0.0196705	-0.258252	0.611	0.815	1
ATP6V1B2	0.000483394	-0.258459	0.444	0.679	1
IFIT2	0.0700555	-0.258555	0.25	0.375	1
SMC4	0.0980938	-0.258685	0.306	0.393	1
LYZ	0.25204	-0.260791	0.972	0.988	1
ANKRD22	0.00137388	-0.262544	0.389	0.583	1
HMOX1	0.10664	-0.262562	0.389	0.51	1
CTSB	0.000203043	-0.263097	0.958	0.978	1
OGFRL1	0.00510225	-0.263245	0.681	0.843	1
SLC2A3	0.0736707	-0.266522	0.264	0.369	1
IL17RA	0.000133983	-0.26678	0.333	0.601	1
ANXA2	0.000182208	-0.268725	0.931	0.98	1
NFE2L2	0.00267687	-0.26906	0.611	0.776	1
MCM4	0.000401773	-0.26999	0.083	0.274	1
SPRED1	0.000396386	-0.270149	0.097	0.29	1
ATP1A1	0.000656285	-0.270154	0.556	0.81	1
SNAI1	0.00227216	-0.272573	0.056	0.212	1
TUBA1C	0.0480449	-0.273201	0.556	0.681	1
CXCR4	0.0402449	-0.273727	0.833	0.863	1
CSTA	0.00251079	-0.273839	0.528	0.774	1
SLC18A2	0.0117505	-0.276264	0.069	0.19	1
VEGFA	0.0550031	-0.276434	0.264	0.369	1
ZFP36L1	0.000829848	-0.276679	0.806	0.933	1
PDK4	0.0780557	-0.27678	0.264	0.363	1
PDE4B	0.0491361	-0.278413	0.319	0.454	1
CXCL16	0.00155857	-0.279212	0.611	0.796	1
CD151	0.000237418	-0.281514	0.306	0.55	1
HTRA1	0.00627038	-0.283147	0.014	0.121	1
CDK1	0.00204209	-0.283265	0.028	0.167	1
S100A8	0.012195	-0.284335	0.056	0.171	1
CX3CR1	0.000281677	-0.287054	0.264	0.518	1
CREM	0.00159311	-0.288734	0.139	0.317	1
NECTIN2	1.5044e-06	-0.289734	0.083	0.375	0.0390978
DUSP6	0.0298772	-0.289888	0.403	0.512	1
UBE2C	0.00948981	-0.290427	0.014	0.111	1
RHEB	0.000384899	-0.290768	0.528	0.704	1
CTSD	0.0551512	-0.292947	0.556	0.643	1
SLCO2B1	4.08162e-05	-0.293722	0.028	0.24	1
HCAR3	0.0335442	-0.294127	0.028	0.105	1
TUBA1A	0.0557039	-0.294154	0.75	0.812	1
UBB	0.000954327	-0.295078	1	0.998	1
STX11	0.000544604	-0.296105	0.139	0.337	1
S100A9	0.0025105	-0.297464	0.097	0.26	1
HPGDS	0.00236202	-0.298903	0.236	0.44	1
DHRS7	9.422e-06	-0.301951	0.486	0.764	0.244868
LDHA	0.00038665	-0.302098	0.764	0.905	1
GRINA	9.4501e-05	-0.302431	0.472	0.706	1
GLA	2.89382e-05	-0.303672	0.208	0.496	0.752076
GABARAPL1	0.000100573	-0.304035	0.153	0.409	1
FABP5	9.53828e-05	-0.304796	0.125	0.361	1
YWHAH	0.0004276	-0.307274	0.861	0.97	1
PLXDC2	1.93041e-05	-0.309574	0.597	0.853	0.501695
CCRL2	0.00024113	-0.309594	0.125	0.347	1
PLEK2	6.32059e-05	-0.31106	0.153	0.403	1
PRDX1	6.1023e-05	-0.312871	0.833	0.917	1
NEDD9	0.00513828	-0.314014	0.167	0.337	1
CYTIP	0.0270527	-0.31441	0.569	0.72	1
DNAJB4	0.012298	-0.315012	0.25	0.389	1
XBP1	0.000251701	-0.3153	0.417	0.69	1
JUND	0.000504383	-0.315583	0.319	0.577	1
CLEC2B	0.00862223	-0.317139	0.667	0.804	1
BCAS2	0.00025388	-0.319503	0.319	0.56	1
NINJ1	0.00102995	-0.321942	0.278	0.498	1
SAMSN1	0.000606081	-0.323714	0.25	0.466	1
ZBTB10	0.000986842	-0.324999	0.111	0.3	1
GBP2	5.98107e-05	-0.325457	0.097	0.337	1
FPR1	5.22816e-05	-0.327177	0.681	0.857	1
C3AR1	0.000393195	-0.331608	0.194	0.44	1
TIPARP	0.148041	-0.332197	0.472	0.524	1
FBP1	0.0105101	-0.333029	0.514	0.609	1
CEBPD	0.00492187	-0.33342	0.75	0.921	1
MSR1	8.05267e-05	-0.33397	0.125	0.369	1
KLF2	0.00947292	-0.336611	0.167	0.31	1
FTH1	1.74404e-05	-0.343152	1	1	0.453258
BTG2	0.000118363	-0.346249	0.597	0.829	1
MYADM	0.000428374	-0.351707	0.444	0.71	1
JMJD1C	0.00668642	-0.355188	0.625	0.768	1
ARL4A	0.00650969	-0.361427	0.194	0.347	1
HSPA5	2.30518e-05	-0.362543	0.681	0.907	0.599093
EIF5	0.000147129	-0.362706	0.694	0.827	1
DDIT3	0.000233972	-0.365588	0.139	0.369	1
PDLIM7	1.58103e-07	-0.366736	0.111	0.456	0.00410893
JUNB	0.000486881	-0.368219	0.931	0.958	1
CENPF	0.0262541	-0.369124	0.097	0.206	1
NLRP3	0.0188568	-0.371824	0.306	0.47	1
MIR155HG	0.000184016	-0.372939	0.014	0.19	1
SAP30	0.000102857	-0.373547	0.167	0.413	1
GLUL	2.93009e-05	-0.373924	0.819	0.925	0.761502
PTP4A1	4.79793e-06	-0.374148	0.319	0.631	0.124693
TREM1	1.69127e-05	-0.374868	0.028	0.258	0.439545
DNAJA4	0.000139084	-0.375982	0.042	0.238	1
FCGR1A	6.59285e-06	-0.377742	0.139	0.429	0.171342
HIST1H4C	0.154574	-0.377765	0.458	0.546	1
PMAIP1	0.000225985	-0.37808	0.208	0.47	1
TCP1	5.397e-06	-0.379009	0.444	0.73	0.140263
PCNA	0.00124455	-0.379032	0.236	0.435	1
INSIG1	0.00327105	-0.380257	0.208	0.387	1
CD63	2.74162e-06	-0.380299	0.903	0.948	0.071252
NUSAP1	0.0876786	-0.380869	0.153	0.232	1
AP1S2	1.61869e-05	-0.381576	0.722	0.885	0.420682
IFRD1	2.89443e-05	-0.38423	0.111	0.363	0.752235
BHLHE40	0.00231914	-0.384956	0.708	0.798	1
CCL5	0.00472174	-0.387194	0.056	0.196	1
IFIT1	0.550312	-0.388613	0.264	0.3	1
PNRC1	0.000301956	-0.391967	0.847	0.962	1
CSRNP1	3.58695e-05	-0.392015	0.139	0.385	0.932213
SERPINA1	7.10856e-07	-0.392194	0.708	0.927	0.0184744
ZNF331	0.0186025	-0.393407	0.111	0.232	1
CLK1	0.00205349	-0.399747	0.486	0.677	1
SQSTM1	0.000946876	-0.400473	0.611	0.823	1
MCL1	4.23418e-05	-0.403819	0.75	0.901	1
PPP1R15B	0.00267865	-0.404826	0.333	0.532	1
SRSF7	0.00364734	-0.407224	0.792	0.923	1
TAGAP	2.07017e-05	-0.411293	0.389	0.655	0.538015
BHLHE41	5.17414e-06	-0.412039	0.222	0.538	0.134471
ICAM1	0.0147978	-0.412567	0.472	0.589	1
SOCS3	3.44046e-05	-0.419907	0.222	0.466	0.894141
KBTBD8	3.6144e-07	-0.425451	0.097	0.423	0.00939346
KLF10	3.81296e-05	-0.428613	0.306	0.579	0.99095
TK1	0.000474715	-0.429713	0.014	0.171	1
TRA2B	8.78087e-05	-0.430079	0.597	0.829	1
TGFBI	1.38341e-06	-0.432474	0.819	0.954	0.0359535
FCGBP	0.0244899	-0.432622	0.139	0.254	1
FILIP1L	0.000463383	-0.436369	0.486	0.734	1
ANXA1	7.65076e-05	-0.441333	0.903	0.966	1
CCNL1	0.00135439	-0.446277	0.694	0.851	1
H2AFZ	0.0455248	-0.446314	0.764	0.871	1
TYMS	0.000654608	-0.448805	0.014	0.165	1
CEBPB	0.000945461	-0.450263	0.5	0.685	1
GADD45B	0.000126033	-0.454915	0.653	0.837	1
ARL5B	4.61612e-05	-0.461488	0.069	0.288	1
FCGR2A	1.36685e-08	-0.462156	0.597	0.927	0.000355229
SRGN	3.35616e-07	-0.464925	0.972	0.998	0.00872233
HCAR2	0.000160079	-0.468965	0.014	0.196	1
EIF4A3	0.000903749	-0.471946	0.528	0.724	1
A2M	0.000366926	-0.472429	0.319	0.524	1
TUBB4B	1.3465e-05	-0.475754	0.306	0.565	0.349941
TUBA1B	0.000248953	-0.47862	0.944	0.978	1
PCLAF	0.00128931	-0.479407	0.028	0.171	1
MT2A	0.0529504	-0.480255	0.556	0.651	1
RHOB	4.50553e-05	-0.481418	0.264	0.526	1
RIPK2	0.000906076	-0.482322	0.333	0.558	1
FCGR3A	4.9171e-05	-0.485644	0.125	0.375	1
HSPA8	2.38067e-05	-0.487317	0.931	0.996	0.618711
FN1	0.00268497	-0.488129	0.472	0.655	1
B3GNT5	2.66325e-08	-0.497441	0.361	0.756	0.000692151
MAFF	4.67253e-06	-0.498972	0.056	0.31	0.121434
BTG1	3.76496e-05	-0.499054	0.806	0.956	0.978476
HLA-DRB6	0.0107294	-0.503035	0.139	0.278	1
UBC	1.59074e-06	-0.507678	0.944	1	0.0413417
MAFB	2.68397e-05	-0.508307	0.222	0.484	0.697538
ZFAND2A	0.000653035	-0.509473	0.111	0.302	1
P2RY13	0.000449993	-0.510531	0.778	0.913	1
CD9	6.86049e-06	-0.513988	0.347	0.631	0.178297
DNAJA1	1.37896e-05	-0.51764	0.792	0.929	0.358377
ZFAND5	0.000360457	-0.522654	0.722	0.885	1
TUBB	0.0365018	-0.523892	0.778	0.815	1
CITED2	0.000202246	-0.524818	0.556	0.744	1
RASGEF1B	5.57009e-06	-0.532787	0.111	0.395	0.144761
IL1RN	0.000216212	-0.534324	0.111	0.312	1
RGS16	0.00828309	-0.539554	0.111	0.248	1
SOD2	0.000191532	-0.539609	0.25	0.482	1
TMEM176A	1.74369e-05	-0.542644	0.208	0.484	0.453168
S100B	0.0610391	-0.542679	0.431	0.548	1
PRDM1	6.65878e-05	-0.54504	0.111	0.347	1
TREM2	6.9302e-07	-0.546623	0.222	0.548	0.0180109
HLA-DQB2	0.000709969	-0.548307	0.069	0.25	1
PHLDA1	0.000214743	-0.550794	0.125	0.335	1
FTL	4.60769e-10	-0.553236	1	1	1.19749e-05
TRIB1	5.82199e-08	-0.557797	0.25	0.603	0.00151308
SPP1	0.37406	-0.566617	0.181	0.224	1
PTGS2	0.000522486	-0.568089	0.125	0.331	1
TMEM176B	1.79447e-05	-0.581221	0.319	0.591	0.466365
TOP2A	0.00108714	-0.581927	0.014	0.157	1
MARCKS	8.19521e-07	-0.584906	0.347	0.651	0.0212985
PLEK	0.000687538	-0.59111	0.819	0.948	1
IL7R	0.00222907	-0.591661	0.097	0.25	1
C1QA	2.82898e-06	-0.596876	0.444	0.738	0.0735223
PLAUR	5.13116e-05	-0.599689	0.292	0.552	1
CKS2	1.39487e-05	-0.602046	0.236	0.478	0.362513
MKI67	0.00662856	-0.603542	0.042	0.161	1
HSP90AB1	6.9078e-07	-0.611743	0.972	0.998	0.0179527
NAMPT	6.79825e-05	-0.617648	0.347	0.573	1
EGR2	5.35769e-06	-0.618244	0.278	0.571	0.139241
C3	5.63101e-07	-0.619525	0.264	0.595	0.0146344
ALOX5AP	8.78728e-11	-0.626497	0.833	0.98	2.28373e-06
IER5	2.05448e-05	-0.631251	0.486	0.683	0.533938
TNF	0.00925608	-0.63517	0.264	0.415	1
CCL22	0.341003	-0.637831	0.139	0.181	1
CD69	0.0127829	-0.648559	0.583	0.685	1
SAT1	1.06819e-06	-0.64945	0.958	0.992	0.0277611
HLA-DQA2	2.01409e-06	-0.651778	0.111	0.399	0.0523441
CDKN1A	3.58624e-06	-0.654377	0.444	0.712	0.0932028
CLEC5A	1.11343e-10	-0.657729	0.25	0.696	2.89368e-06
KLF4	0.000468418	-0.661957	0.472	0.647	1
DUSP5	8.02933e-06	-0.684781	0.111	0.363	0.208674
HMGB2	6.34711e-05	-0.695578	0.528	0.738	1
STMN1	0.000987471	-0.703182	0.306	0.522	1
PLAU	3.01796e-09	-0.704019	0.278	0.657	7.84337e-05
FOS	5.7996e-07	-0.707999	0.917	0.988	0.0150726
RGS2	0.00106978	-0.710858	0.694	0.827	1
ZFP36	2.66545e-06	-0.711527	0.944	0.972	0.0692723
HBEGF	1.89126e-05	-0.732683	0.097	0.335	0.491519
AREG	0.00824325	-0.757182	0.236	0.397	1
HSPE1	1.74681e-07	-0.757684	0.639	0.869	0.00453977
CD14	2.43465e-05	-0.761168	0.389	0.603	0.632741
IER2	3.86785e-09	-0.761638	0.708	0.911	0.000100522
OTUD1	6.05226e-07	-0.761893	0.056	0.341	0.0157292
PTGER4	2.8208e-08	-0.774903	0.208	0.577	0.000733098
NFKBIA	3.50963e-06	-0.78323	0.972	1	0.0912118
CXCL3	0.0364617	-0.785568	0.028	0.103	1
HSPA6	0.0022368	-0.787154	0.153	0.331	1
CCL2	0.000448349	-0.822485	0.097	0.29	1
HSPB1	4.33288e-05	-0.825045	0.722	0.895	1
TNFAIP3	1.9252e-05	-0.841252	0.569	0.766	0.500339
NFKBIZ	1.47445e-05	-0.849126	0.278	0.524	0.383194
C15orf48	3.19737e-05	-0.858727	0.153	0.415	0.830965
RGS1	8.1206e-10	-0.887767	0.806	0.964	2.11046e-05
JUN	2.53216e-08	-0.911645	0.917	0.992	0.000658084
HSPD1	6.66911e-08	-0.912063	0.722	0.909	0.00173323
SGK1	6.06382e-09	-0.914937	0.694	0.923	0.000157593
IER3	1.00776e-07	-0.918718	0.611	0.873	0.00261906
DUSP1	1.20408e-09	-0.926245	0.819	0.956	3.12928e-05
BAG3	0.000378685	-0.929517	0.111	0.302	1
PPP1R15A	2.31274e-06	-0.930158	0.417	0.679	0.0601058
C1QB	2.122e-06	-0.94412	0.458	0.669	0.0551488
NR4A3	1.52715e-07	-0.944574	0.069	0.387	0.0039689
KLF6	3.06209e-07	-0.948677	0.833	0.962	0.00795808
NR4A1	1.43398e-07	-0.959178	0.306	0.597	0.00372677
DUSP2	2.03284e-05	-0.972705	0.181	0.435	0.528314
PLIN2	1.53333e-05	-1.02507	0.5	0.724	0.398498
HSPA1B	1.02871e-05	-1.02958	0.486	0.702	0.267352
CXCL10	0.490823	-1.03375	0.111	0.137	1
C1QC	5.8786e-09	-1.03547	0.361	0.688	0.000152779
FOSB	7.84539e-06	-1.05336	0.472	0.698	0.203894
HSP90AA1	2.37532e-08	-1.07826	0.986	1	0.000617323
NR4A2	6.05751e-08	-1.09716	0.111	0.44	0.00157429
OLR1	2.45483e-18	-1.10256	0.222	0.768	6.37986e-14
GPR183	3.67284e-13	-1.12753	0.708	0.921	9.54533e-09
EGR1	3.07808e-09	-1.1407	0.542	0.812	7.99963e-05
CXCL2	0.000104502	-1.16935	0.069	0.272	1
BCL2A1	6.02339e-09	-1.18187	0.278	0.631	0.000156542
HSPA1A	1.1345e-07	-1.19483	0.722	0.901	0.00294845
CCL4L2	1.30872e-06	-1.23218	0.389	0.657	0.0340124
CLDN1	1.51305e-11	-1.23434	0.208	0.615	3.93227e-07
G0S2	0.00297152	-1.31482	0.097	0.242	1
CD83	1.14966e-10	-1.38569	0.306	0.669	2.98784e-06
HSPH1	3.04177e-08	-1.38596	0.458	0.819	0.000790527
CCL3	1.35057e-08	-1.38898	0.333	0.663	0.000351001
CCL4	9.00961e-05	-1.40318	0.403	0.649	1
CCL3L1	1.26566e-06	-1.40746	0.333	0.621	0.0328933
DNAJB1	6.84196e-09	-1.44601	0.528	0.827	0.000177816
ATF3	4.20752e-10	-1.45082	0.181	0.569	1.09349e-05
IL1B	1.46304e-11	-1.80518	0.333	0.728	3.80229e-07
CXCL8	8.52309e-08	-2.0598	0.236	0.55	0.00221507

## Sheet: P21120201.clustercDC2_4_diffgen
gene_id	p_val	avg_logFC	pct.1	pct.2	p_val_adj
CCL22	9.10882e-10	1.83124	0.424	0.143	2.36729e-05
S100B	1.39034e-19	1.73345	0.879	0.488	3.61334e-15
CD207	3.08568e-21	1.70904	0.758	0.297	8.01938e-17
CD1A	6.30331e-26	1.48155	0.894	0.365	1.63817e-21
HLA-DQB2	1.0754e-22	1.42198	0.667	0.169	2.79486e-18
WFDC21P	8.61437e-16	1.38196	0.864	0.524	2.23879e-11
FCGBP	5.70747e-15	1.11031	0.591	0.193	1.48331e-10
LTB	8.37768e-09	1.06857	0.803	0.58	0.000217728
CST7	1.95854e-10	1.03227	0.712	0.4	5.09004e-06
SLC18A2	3.10364e-29	0.944231	0.652	0.112	8.06606e-25
C15orf48	1.98604e-10	0.940894	0.712	0.339	5.16152e-06
IL7R	4.90769e-13	0.934321	0.561	0.187	1.27546e-08
LAMP3	1.83917e-10	0.903449	0.394	0.12	4.77982e-06
CD1B	6.9095e-09	0.881487	0.606	0.295	0.000179571
FCER1A	6.20956e-08	0.870859	0.879	0.745	0.0016138
CD1E	1.4785e-15	0.870203	0.939	0.625	3.84248e-11
SYNGR2	5.59708e-14	0.762194	0.97	0.926	1.45463e-09
C1QC	3.57877e-09	0.673102	0.848	0.62	9.30086e-05
GSN	4.15445e-16	0.652892	1	0.968	1.0797e-11
NUB1	0.000118725	0.651058	0.833	0.659	1
TMEM176B	6.14416e-08	0.624056	0.803	0.524	0.00159681
TMEM176A	6.04149e-09	0.622486	0.742	0.41	0.000157012
CD1C	1.42711e-09	0.601599	0.939	0.751	3.70891e-05
TACSTD2	0.000823238	0.594865	0.379	0.223	1
CCL17	0.179348	0.584768	0.561	0.5	1
HLA-DQA2	4.57989e-10	0.570818	0.697	0.319	1.19027e-05
GRINA	7.29003e-09	0.550039	0.864	0.651	0.000189461
FSCN1	0.000785493	0.533095	0.288	0.135	1
IL4I1	6.9291e-08	0.528153	0.348	0.112	0.0018008
PRMT7	2.79938e-08	0.518344	0.424	0.157	0.000727532
MSI2	1.28268e-08	0.513939	0.515	0.225	0.000333357
GPR82	1.50406e-08	0.506405	0.758	0.41	0.00039089
CXCR2	3.08549e-09	0.502578	0.515	0.203	8.01888e-05
SERPINB9	1.32051e-07	0.487782	0.864	0.588	0.00343187
CD200R1	3.06164e-08	0.485018	0.621	0.321	0.00079569
ATP2B1	9.66503e-07	0.482737	0.803	0.602	0.0251185
SH2D4A	2.45264e-11	0.476143	0.455	0.143	6.37415e-07
CCNG2	8.80277e-09	0.47532	0.697	0.371	0.000228775
CD40	0.000288982	0.469125	0.636	0.444	1
C1QB	9.64787e-05	0.465314	0.773	0.625	1
SUCNR1	6.326e-09	0.463636	0.606	0.273	0.000164407
TRPM4	3.50627e-13	0.460479	0.621	0.207	9.11244e-09
SMCO4	2.89938e-10	0.460037	0.909	0.625	7.53519e-06
MYBL1	1.33262e-08	0.457389	0.5	0.195	0.000346335
HLA-DQA1	1.09728e-11	0.451074	1	0.996	2.85171e-07
MT-TE	2.01598e-08	0.448012	0.803	0.484	0.000523933
ALOX5AP	5.85871e-09	0.446867	1	0.956	0.000152262
TNFSF12	7.09202e-07	0.44257	0.818	0.596	0.0184315
ABCA6	1.75618e-05	0.438496	0.424	0.187	0.456414
CMTM6	4.44554e-07	0.435814	0.924	0.869	0.0115535
CSF2RB	1.19583e-10	0.426123	0.742	0.363	3.10785e-06
LITAF	7.64695e-09	0.419254	0.985	0.936	0.000198737
GNA15	6.65004e-05	0.416726	0.621	0.444	1
CD58	1.02366e-05	0.412539	0.894	0.721	0.26604
NAALADL1	1.23974e-07	0.411008	0.439	0.175	0.00322197
CD2	0.0207665	0.410704	0.5	0.414	1
NAAA	3.28351e-07	0.408107	0.864	0.637	0.00853351
CD52	0.00154659	0.406816	0.939	0.894	1
TXN	3.33408e-06	0.393547	0.955	0.761	0.0866495
IRF4	5.81366e-08	0.388526	0.409	0.147	0.00151091
MT-TP	3.38981e-09	0.387821	0.697	0.331	8.80979e-05
RUNX3	1.39993e-07	0.379757	0.606	0.303	0.00363828
TNFSF18	7.86521e-06	0.378353	0.167	0.038	0.204409
SLC38A1	2.07157e-08	0.378087	0.652	0.325	0.00053838
GGTA1P	6.61449e-05	0.375852	0.803	0.604	1
PARM1	2.7585e-08	0.375621	0.727	0.376	0.000716906
NDRG2	1.90249e-06	0.37465	0.894	0.751	0.0494439
CXCL16	2.0015e-05	0.374204	0.894	0.757	0.52017
GPR137B	1.18352e-09	0.367947	0.5	0.187	3.07586e-05
LCP1	2.17289e-07	0.357324	1	0.998	0.00564712
NECTIN2	2.38403e-10	0.357296	0.682	0.293	6.19586e-06
BASP1	0.000653033	0.356867	0.909	0.799	1
HLA-DOB	1.71302e-05	0.356214	0.652	0.394	0.445196
HLA-DRB5	6.92559e-07	0.352631	0.924	0.773	0.0179989
HLA-DQB1	9.76783e-12	0.35129	1	1	2.53856e-07
SVIL	5.11605e-06	0.349306	0.576	0.327	0.132961
ARL6IP5	2.35359e-07	0.349296	0.97	0.952	0.00611675
GNPTAB	8.868e-07	0.347403	0.879	0.606	0.0230471
TNFRSF11A	8.95649e-06	0.345894	0.303	0.112	0.23277
PKIB	3.18256e-06	0.344357	0.924	0.821	0.0827115
NINJ1	0.0703695	0.342597	0.545	0.46	1
QPRT	2.27922e-06	0.34152	0.5	0.243	0.0592347
PXDC1	9.95164e-07	0.341104	0.53	0.251	0.0258633
CSTA	0.0269042	0.340999	0.833	0.731	1
ANXA11	2.49465e-08	0.34048	0.955	0.727	0.000648336
EBI3	0.0058618	0.331158	0.167	0.074	1
TRPC6	4.32482e-08	0.329168	0.47	0.189	0.00112398
ALG2	0.000848781	0.329141	0.773	0.592	1
VASP	5.67967e-05	0.328778	0.864	0.799	1
JAML	2.06939e-05	0.327682	0.97	0.892	0.537814
CD59	9.25264e-07	0.322068	0.833	0.536	0.0240467
RFLNB	3.5539e-06	0.321009	0.394	0.171	0.0923623
SDC4	9.34098e-05	0.320103	0.348	0.157	1
BCL3	0.000102243	0.316424	0.424	0.223	1
CYSTM1	0.000260545	0.314088	0.576	0.365	1
PTAFR	0.000143893	0.3138	0.894	0.807	1
CEACAM4	0.000702075	0.313388	0.439	0.271	1
CSF2RA	0.000982583	0.312514	0.909	0.775	1
SPAG9	3.03162e-05	0.311678	0.742	0.48	0.787887
ENTPD1	4.46128e-05	0.307861	0.788	0.562	1
MCOLN2	8.00751e-07	0.306156	0.53	0.265	0.0208107
GNAO1	3.23689e-07	0.306049	0.576	0.263	0.00841236
SOCS1	0.000238921	0.304501	0.742	0.54	1
C1QA	0.000312175	0.302621	0.848	0.681	1
TAP1	5.12964e-05	0.297464	0.788	0.564	1
ALCAM	0.00290821	0.296638	0.939	0.849	1
MIR155HG	0.385854	0.29662	0.197	0.163	1
AQP3	7.56199e-07	0.295882	0.5	0.221	0.0196528
LST1	0.000152278	0.291519	0.985	0.976	1
FFAR4	2.29171e-05	0.289974	0.515	0.293	0.595594
SOAT1	0.000129039	0.289124	0.773	0.568	1
CST3	0.000624605	0.288743	1	0.998	1
MPZL2	3.26819e-07	0.288264	0.667	0.343	0.00849369
PHTF2	0.00358923	0.286315	0.424	0.265	1
FPR1	9.59282e-05	0.285392	0.939	0.821	1
CSTB	0.092504	0.284388	0.939	0.912	1
DPYSL2	4.47535e-05	0.284337	0.848	0.639	1
BIRC3	0.252888	0.28422	0.394	0.329	1
BCL2L11	5.35692e-06	0.280673	0.621	0.343	0.139221
APOL4	9.28425e-05	0.275956	0.667	0.43	1
KYNU	0.000710903	0.275486	0.682	0.506	1
PDCD10	5.32048e-06	0.274931	0.788	0.538	0.138274
IGSF6	1.23486e-05	0.27416	1	0.974	0.320928
IL2RG	0.00105476	0.272689	0.833	0.689	1
AXL	0.000264272	0.26983	0.864	0.627	1
HLA-DRA	7.35553e-12	0.269457	1	1	1.91163e-07
TAPBP	0.000436309	0.269425	0.924	0.773	1
UGCG	0.00267622	0.268842	0.652	0.49	1
CD63	0.00233129	0.268402	0.955	0.94	1
REL	0.00401388	0.267932	0.833	0.715	1
ADAM19	7.74563e-07	0.265779	0.409	0.167	0.0201301
CHCHD7	9.92013e-05	0.265377	0.697	0.45	1
N4BP1	1.40603e-05	0.263899	0.712	0.41	0.365413
RAB32	0.000550879	0.26379	0.879	0.821	1
CISH	0.000310951	0.263296	0.773	0.558	1
MARCKSL1	0.000923074	0.26227	0.455	0.249	1
ARHGAP31	2.79997e-06	0.261443	0.697	0.418	0.0727684
HLA-DPA1	2.86611e-07	0.261178	1	1	0.00744873
ANKRD22	0.00020791	0.260848	0.773	0.53	1
SLC31A2	0.000197815	0.260413	0.773	0.526	1
CDKN1A	0.00987393	0.259822	0.803	0.661	1
CDH1	5.75915e-05	0.259746	0.439	0.217	1
HLA-DMB	4.84075e-06	0.259714	1	0.986	0.125806
BAZ1A	0.09019	0.258606	0.712	0.614	1
ATP6V1A	0.0010113	0.25843	0.712	0.542	1
FBXO6	9.08598e-06	0.257021	0.621	0.351	0.236136
TYROBP	1.21238e-06	0.25626	0.985	0.996	0.0315087
UCHL3	2.80336e-07	0.255511	0.667	0.347	0.00728566
MAP3K13	8.87182e-05	0.253889	0.758	0.544	1
RALA	0.000124224	0.253323	0.773	0.57	1
ACOT9	5.85711e-06	0.252917	0.636	0.347	0.152221
FAM105A	0.000550428	0.251313	0.833	0.685	1
SELENOS	0.000646199	0.251072	0.636	0.442	1
KLF9	0.0307685	-0.250315	0.485	0.558	1
PMP22	0.00154548	-0.250418	0.121	0.295	1
MYLIP	0.00138009	-0.252983	0.076	0.245	1
GPX1	0.000104008	-0.253332	1	1	1
UPP1	0.0606868	-0.25368	0.742	0.729	1
KRT10	0.00967592	-0.255893	0.53	0.62	1
DUSP6	0.0435209	-0.256826	0.394	0.512	1
CNTRL	0.00156094	-0.258073	0.545	0.647	1
CLEC2B	0.0285035	-0.258655	0.773	0.789	1
BRD2	0.0511835	-0.258908	0.803	0.787	1
TRIB1	0.370252	-0.259513	0.545	0.56	1
WSB1	0.00437994	-0.261228	0.788	0.815	1
RPL4	5.65564e-06	-0.26303	1	0.98	0.146984
SMC4	0.184004	-0.263381	0.333	0.388	1
UBE2C	0.0450363	-0.26587	0.03	0.108	1
NASP	0.000545161	-0.266033	0.348	0.542	1
AOAH	0.00153754	-0.267248	0.167	0.353	1
FOXN2	0.0062575	-0.268224	0.621	0.721	1
MSR1	0.0147189	-0.269772	0.212	0.355	1
IFIT2	0.804366	-0.271705	0.409	0.353	1
DNAJA1	0.0514425	-0.271942	0.879	0.916	1
UBE2L6	0.00514835	-0.272719	0.621	0.739	1
CKS2	0.0815785	-0.273609	0.379	0.456	1
MEF2A	0.000255807	-0.273926	0.758	0.845	1
LIMD2	0.0184065	-0.277066	0.742	0.753	1
OLFML3	0.00506756	-0.278362	0.091	0.239	1
HTRA1	0.0666294	-0.278504	0.045	0.116	1
NAMPT	0.0288654	-0.280217	0.5	0.55	1
PLAU	0.0285087	-0.281163	0.53	0.62	1
TMPO	0.00872731	-0.287958	0.424	0.558	1
S100A4	0.000531048	-0.289638	1	0.982	1
ARL4A	0.00535737	-0.293299	0.182	0.347	1
TREM2	0.0116746	-0.297809	0.364	0.526	1
APLP2	0.000543038	-0.298444	0.773	0.839	1
SAT1	0.0144071	-0.298875	1	0.986	1
ITGAM	0.000133659	-0.30353	0.152	0.386	1
SRSF3	0.000147745	-0.303663	0.879	0.92	1
DDIT4	0.0123314	-0.304298	0.545	0.665	1
CITED2	0.328196	-0.305709	0.742	0.717	1
INSIG1	0.0230648	-0.306666	0.242	0.38	1
BCL2A1	0.246391	-0.306919	0.591	0.586	1
C3AR1	0.00120417	-0.314377	0.242	0.43	1
RETN	0.0337699	-0.315341	0.091	0.193	1
VSIR	0.000566349	-0.316614	0.545	0.725	1
MPEG1	0.000626375	-0.319529	0.121	0.309	1
SELL	0.00263428	-0.319591	0.182	0.339	1
ZFP36L2	5.22171e-05	-0.320109	0.909	0.974	1
KLF10	0.0304693	-0.321137	0.455	0.556	1
APOE	0.880893	-0.322494	0.333	0.301	1
SLC2A3	0.11699	-0.32264	0.303	0.363	1
MT-RNR1	0.00439046	-0.323576	1	1	1
SNX10	0.000256074	-0.323773	0.727	0.809	1
HCAR3	0.00522086	-0.323914	0	0.108	1
CCR2	3.11774e-05	-0.327855	0.182	0.468	0.810268
FCN1	0.00786045	-0.329561	0.061	0.191	1
STMN1	0.322619	-0.330559	0.47	0.498	1
FCGR2A	0.0102953	-0.331953	0.939	0.878	1
TAGAP	0.0768666	-0.332183	0.591	0.625	1
PLP2	0.000842447	-0.333985	0.652	0.725	1
IER5	0.167683	-0.334955	0.636	0.661	1
PLK2	0.000931221	-0.337185	0.121	0.299	1
SRSF7	0.000975232	-0.33922	0.894	0.908	1
PHACTR1	9.16604e-07	-0.33927	0.303	0.598	0.0238216
CD99	0.000727743	-0.340237	0.485	0.627	1
GIMAP4	0.00216689	-0.343056	0.258	0.424	1
MT-RNR2	0.00125871	-0.344881	1	1	1
MAFB	0.00839488	-0.345022	0.333	0.466	1
HSPA8	0.00705417	-0.352231	1	0.986	1
SNAI1	0.00100371	-0.353561	0.045	0.211	1
UBB	0.0207495	-0.353755	1	0.998	1
KLF2	0.0015048	-0.359384	0.136	0.313	1
BAG3	0.0320017	-0.364931	0.167	0.293	1
ID2	0.00532122	-0.368697	0.833	0.892	1
MGAT4A	2.29995e-05	-0.36875	0.394	0.592	0.597733
CD83	0.133325	-0.370167	0.606	0.625	1
EIF4A3	0.0664329	-0.373825	0.682	0.701	1
DDIT3	0.00214339	-0.373885	0.197	0.359	1
CEBPB	0.000397057	-0.378145	0.545	0.677	1
TWISTNB	0.383024	-0.379097	0.485	0.472	1
SPP1	0.32289	-0.383963	0.182	0.223	1
LYZ	0.067097	-0.384081	0.97	0.988	1
OTUD1	0.0214229	-0.386076	0.197	0.319	1
DNAJB4	0.0044501	-0.389517	0.227	0.39	1
KCTD12	5.18234e-07	-0.390239	0.833	0.912	0.0134684
CCL5	0.0883805	-0.390242	0.106	0.187	1
GAPT	0.000158921	-0.391383	0.576	0.735	1
CD163	7.01527e-05	-0.393546	0.167	0.396	1
C1orf162	3.76716e-06	-0.395048	0.985	0.988	0.0979047
RHOB	5.53685e-05	-0.399494	0.273	0.522	1
HSPB1	0.122062	-0.400052	0.833	0.878	1
ATP2B1-AS1	0.00431192	-0.404808	0.227	0.38	1
EGR2	0.00378563	-0.407659	0.394	0.552	1
HCAR2	0.00357656	-0.408399	0.045	0.189	1
VSIG4	0.00439576	-0.410039	0.167	0.329	1
PDK4	0.0763487	-0.413019	0.273	0.361	1
ZFAND2A	0.187116	-0.417687	0.227	0.285	1
CENPF	0.0392816	-0.426441	0.106	0.203	1
FCGR1A	0.000124923	-0.432666	0.212	0.416	1
PRDM1	0.056439	-0.433992	0.242	0.327	1
PHLDA1	0.0328322	-0.434849	0.212	0.321	1
TNF	0.436094	-0.438483	0.394	0.396	1
HIST1H4C	0.108131	-0.439127	0.53	0.536	1
ANXA1	0.000720303	-0.441399	0.955	0.958	1
HSPD1	0.0100956	-0.443731	0.924	0.88	1
MKI67	0.263238	-0.444568	0.106	0.151	1
CEBPD	0.000299652	-0.447842	0.788	0.914	1
NR4A2	0.00138808	-0.448882	0.227	0.42	1
NR4A1	0.00221181	-0.450197	0.424	0.578	1
CX3CR1	5.79422e-06	-0.455126	0.242	0.518	0.150586
UBC	0.00395956	-0.459531	1	0.992	1
HSPA6	0.924219	-0.460214	0.333	0.305	1
CLK1	0.00305889	-0.464402	0.606	0.659	1
PTGS2	0.0107517	-0.470334	0.167	0.323	1
CD9	0.000267708	-0.480213	0.485	0.61	1
IER2	0.00373765	-0.480471	0.864	0.888	1
HSP90AB1	0.000295334	-0.492654	1	0.994	1
TOP2A	0.0407892	-0.494178	0.061	0.149	1
NFKBIA	0.257081	-0.503229	1	0.996	1
PLAC8	0.00128559	-0.51	0.53	0.661	1
HSPE1	0.000302405	-0.530828	0.818	0.843	1
HBEGF	0.0005143	-0.541111	0.121	0.329	1
RGCC	0.000829203	-0.556983	0.258	0.458	1
ZFP36	0.000337453	-0.567339	0.97	0.968	1
IFITM2	6.47139e-06	-0.57315	0.818	0.918	0.168185
HMGB2	0.0598727	-0.580037	0.742	0.707	1
FN1	0.112321	-0.580813	0.621	0.633	1
RGS2	0.0043762	-0.581416	0.788	0.813	1
G0S2	0.0585114	-0.585709	0.136	0.235	1
C3	0.0046952	-0.594781	0.47	0.564	1
PMAIP1	0.0148457	-0.613305	0.348	0.448	1
GADD45B	0.000885423	-0.619579	0.727	0.825	1
PTGER4	0.00179019	-0.62998	0.424	0.544	1
EGR1	0.00152452	-0.652531	0.712	0.787	1
RGS1	0.000440156	-0.66702	0.955	0.942	1
TRA2B	1.98668e-07	-0.67567	0.591	0.827	0.00516317
NFKBIZ	0.00117957	-0.683602	0.364	0.51	1
DUSP2	0.0959733	-0.684067	0.348	0.41	1
CXCR4	2.33902e-10	-0.701302	0.667	0.884	6.07889e-06
CCL2	0.00465365	-0.711193	0.121	0.285	1
KLF4	3.2482e-06	-0.715808	0.409	0.653	0.0844175
CD69	0.00074206	-0.722038	0.591	0.683	1
IL1B	0.00332842	-0.73061	0.576	0.691	1
PLIN2	0.154785	-0.748536	0.682	0.697	1
HLA-DRB6	0.00321316	-0.759205	0.121	0.279	1
IER3	0.00410837	-0.766637	0.833	0.841	1
PPP1R15A	2.87672e-05	-0.768367	0.439	0.673	0.747631
HSPH1	0.00326386	-0.782564	0.727	0.779	1
TNFAIP3	0.00020278	-0.783141	0.621	0.757	1
KLF6	0.000179306	-0.78647	0.909	0.95	1
FCGR3A	1.48669e-06	-0.78661	0.091	0.376	0.0386376
FOSB	1.34146e-05	-0.818243	0.515	0.689	0.348632
CCL4	0.00832874	-0.922901	0.561	0.625	1
DUSP1	3.589e-07	-0.924327	0.924	0.94	0.00932745
SGK1	1.93718e-06	-0.930836	0.848	0.9	0.0503453
HSP90AA1	2.98382e-07	-0.958985	1	0.998	0.00775465
HSPA1B	4.59484e-05	-0.994837	0.561	0.689	1
ATF3	0.000812893	-1.01381	0.409	0.534	1
CXCL2	0.0129931	-1.01594	0.136	0.261	1
JUN	1.21419e-08	-1.07846	0.97	0.984	0.000315555
FOS	1.41946e-10	-1.107	0.955	0.982	3.68903e-06
HSPA1A	6.47683e-05	-1.12229	0.833	0.884	1
CCL4L2	0.0043366	-1.13976	0.545	0.633	1
CCL3	0.000108941	-1.21566	0.5	0.637	1
DNAJB1	5.43133e-08	-1.30479	0.606	0.813	0.00141155
CCL3L1	2.42584e-06	-1.38021	0.364	0.614	0.0630451
HBB	0.167724	-1.3831	0.121	0.072	1
CXCL8	0.000304952	-1.50719	0.364	0.53	1

## Sheet: P21120201.clustercDC2_5_diffgen
gene_id	p_val	avg_logFC	pct.1	pct.2	p_val_adj
STMN1	5.53414e-39	2.04825	1	0.432	1.43827e-34
MKI67	7.67211e-74	1.92513	0.889	0.053	1.99391e-69
TOP2A	9.65128e-78	1.89009	0.889	0.046	2.50827e-73
HMGB2	8.42162e-35	1.81327	1	0.675	2.1887e-30
TUBB	1.32704e-35	1.69182	1	0.786	3.44884e-31
TYMS	1.46809e-80	1.55009	0.921	0.05	3.81542e-76
PCLAF	1.2894e-76	1.54855	0.921	0.057	3.35102e-72
NUSAP1	1.20941e-50	1.53962	0.889	0.139	3.14313e-46
H2AFZ	4.98414e-36	1.51619	1	0.84	1.29533e-31
TK1	2.09178e-72	1.47326	0.889	0.059	5.43633e-68
CENPF	1.87199e-48	1.46427	0.841	0.111	4.8651e-44
HIST1H4C	1.767e-18	1.4317	0.905	0.489	4.59226e-14
TUBA1B	9.23772e-34	1.29984	1	0.97	2.40079e-29
UBE2C	2.52732e-82	1.27641	0.778	0.014	6.56824e-78
HMGB1	2.09469e-31	1.19039	1	0.954	5.44389e-27
SMC4	1.12662e-32	1.16488	0.905	0.317	2.92796e-28
PCNA	2.41001e-27	1.1483	0.873	0.352	6.26338e-23
CDK1	8.24667e-56	1.1461	0.794	0.069	2.14323e-51
RRM2	2.7059e-73	1.1228	0.667	0.008	7.03236e-69
TMPO	4.64569e-32	1.12176	0.984	0.487	1.20737e-27
TPX2	2.0901e-72	1.10736	0.889	0.055	5.43195e-68
DUT	2.40126e-20	1.08469	0.952	0.616	6.24063e-16
HIST1H1B	6.58356e-36	1.0763	0.524	0.042	1.711e-31
SPP1	9.7571e-11	1.04956	0.524	0.18	2.53577e-06
CCL2	7.74281e-06	1.04785	0.476	0.24	0.201228
FAM111B	3.69603e-72	1.04358	0.762	0.026	9.6056e-68
CKS1B	1.61229e-54	1.01535	0.952	0.145	4.19019e-50
TUBB4B	1.83854e-17	1.014	0.873	0.489	4.77819e-13
HIST1H1D	3.05584e-09	1.01361	0.635	0.307	7.94183e-05
HIST1H1E	1.90797e-08	0.991539	0.698	0.408	0.000495862
PTTG1	8.15342e-26	0.989445	0.794	0.222	2.11899e-21
ATAD2	2.08708e-40	0.98641	0.825	0.149	5.42412e-36
ASPM	3.18482e-65	0.985797	0.683	0.022	8.27704e-61
APOE	4.00055e-07	0.975514	0.556	0.273	0.010397
KIF2C	2.52942e-69	0.968163	0.698	0.018	6.57372e-65
TUBA1C	1.95446e-17	0.966714	0.952	0.63	5.07945e-13
SMC2	2.24058e-36	0.958916	0.921	0.246	5.82304e-32
RAD51AP1	1.00581e-60	0.957484	0.81	0.061	2.614e-56
FN1	3.09423e-08	0.94951	0.857	0.604	0.000804159
FAM111A	9.25654e-24	0.937127	0.889	0.38	2.40568e-19
HIST1H1C	2.45991e-14	0.934708	0.794	0.38	6.39307e-10
CENPM	8.88418e-84	0.9303	0.825	0.02	2.30891e-79
CENPU	5.17945e-63	0.921569	0.857	0.067	1.34609e-58
MCM7	6.95937e-39	0.915988	0.841	0.156	1.80867e-34
NCAPH	5.22655e-86	0.909269	0.873	0.028	1.35833e-81
KIF11	1.97191e-73	0.902325	0.81	0.032	5.12481e-69
CCNB2	2.78833e-60	0.897292	0.651	0.024	7.2466e-56
ESCO2	6.56954e-55	0.896773	0.683	0.04	1.70736e-50
CLSPN	1.61365e-58	0.889643	0.762	0.05	4.19373e-54
TMEM106C	3.46241e-53	0.882222	0.81	0.083	8.99845e-49
NCAPG	8.47644e-71	0.852395	0.714	0.018	2.20294e-66
DEK	2.79303e-24	0.849344	1	0.818	7.25882e-20
MCM3	8.39978e-20	0.846291	0.746	0.297	2.18302e-15
ANLN	2.27096e-70	0.836958	0.667	0.012	5.90201e-66
CDC20	8.95481e-54	0.833972	0.571	0.018	2.32726e-49
KNL1	1.62408e-60	0.833868	0.698	0.032	4.22081e-56
HMMR	1.97844e-55	0.824674	0.54	0.01	5.14177e-51
NUCKS1	6.66641e-22	0.823347	1	0.897	1.73253e-17
H2AFX	5.64717e-31	0.821504	0.841	0.22	1.46764e-26
BIRC5	9.188e-65	0.821498	0.698	0.024	2.38787e-60
CEP55	5.35078e-73	0.815703	0.778	0.026	1.39061e-68
CDKN3	4.11031e-63	0.812328	0.683	0.024	1.06823e-58
H2AFV	6.12399e-20	0.808856	0.984	0.836	1.59156e-15
CKAP2L	5.16046e-79	0.807326	0.683	0.004	1.34115e-74
MCM4	2.71061e-33	0.800903	0.825	0.178	7.0446e-29
EZH2	3.22249e-21	0.795376	0.714	0.224	8.37494e-17
CCNB1	2.86591e-16	0.792023	0.476	0.109	7.44821e-12
LMNB1	7.13718e-26	0.790789	0.937	0.398	1.85488e-21
GGH	5.369e-56	0.784659	0.81	0.069	1.39535e-51
CCNA2	6.39074e-72	0.772817	0.667	0.01	1.66089e-67
GMNN	4.11313e-42	0.771474	0.825	0.125	1.06896e-37
NDC80	1.11077e-69	0.768083	0.667	0.012	2.88677e-65
CENPE	2.16745e-33	0.753785	0.492	0.038	5.63298e-29
UBE2T	3.18594e-41	0.752491	0.651	0.065	8.27994e-37
HMGN2	8.71051e-21	0.749889	0.905	0.483	2.26378e-16
NUF2	1.02291e-70	0.740521	0.698	0.016	2.65845e-66
DNAJC9	2.30571e-24	0.739607	0.873	0.315	5.99231e-20
ASF1B	1.57587e-67	0.733905	0.73	0.026	4.09552e-63
KPNA2	3.48836e-12	0.726244	0.794	0.416	9.06589e-08
MAD2L1	4.91774e-67	0.710717	0.81	0.044	1.27807e-62
ZWINT	4.1599e-49	0.710277	0.762	0.075	1.08112e-44
HMGB3	4.78006e-33	0.707518	0.683	0.107	1.24229e-28
HTRA1	1.5623e-12	0.701779	0.365	0.075	4.06026e-08
RAN	1.29474e-19	0.701158	0.984	0.853	3.36489e-15
NASP	1.10512e-18	0.698251	0.921	0.469	2.87209e-14
KIF23	1.73097e-63	0.694283	0.587	0.008	4.49862e-59
GTSE1	1.03282e-68	0.693389	0.619	0.006	2.6842e-64
MZT2B	4.02605e-17	0.692932	0.984	0.693	1.04633e-12
SGO2	2.95166e-40	0.690581	0.651	0.063	7.67106e-36
PTMA	8.95226e-25	0.686029	1	1	2.3266e-20
FANCI	1.68225e-58	0.682386	0.73	0.04	4.37201e-54
ARL6IP1	4.6839e-07	0.681993	0.921	0.648	0.012173
PRIM1	9.94682e-37	0.679949	0.762	0.121	2.58508e-32
MCM2	2.02838e-32	0.675997	0.651	0.095	5.27155e-28
TNF	0.211553	0.674097	0.429	0.392	1
CENPK	1.22089e-60	0.673912	0.81	0.055	3.17296e-56
SRSF10	4.37839e-19	0.670406	0.952	0.606	1.1379e-14
RAD21	3.8307e-18	0.668617	0.968	0.62	9.95562e-14
ANP32B	3.20968e-19	0.664295	0.984	0.784	8.34163e-15
DLGAP5	4.23896e-51	0.662887	0.46	0.004	1.10166e-46
ATAD5	1.00846e-27	0.659509	0.683	0.127	2.62088e-23
DTYMK	1.14887e-29	0.654533	0.841	0.208	2.98579e-25
NCAPD2	3.87412e-31	0.653639	0.73	0.127	1.00685e-26
IDH2	2.07251e-15	0.646872	0.937	0.614	5.38625e-11
CKAP2	9.28764e-13	0.641824	0.746	0.374	2.41376e-08
AURKA	3.17631e-39	0.638816	0.587	0.05	8.25492e-35
USP1	5.02523e-16	0.637234	0.794	0.372	1.30601e-11
CDCA8	1.12918e-57	0.636424	0.619	0.02	2.93462e-53
CKS2	2.99675e-15	0.634195	0.889	0.392	7.78826e-11
BUB1	2.46338e-47	0.628931	0.651	0.05	6.40207e-43
FBXO5	2.26365e-29	0.628149	0.556	0.071	5.883e-25
SMC1A	3.44534e-16	0.627966	0.873	0.527	8.95409e-12
KIF15	1.35409e-63	0.623569	0.619	0.012	3.51914e-59
C1QB	0.00052461	0.620791	0.762	0.628	1
SIVA1	6.45373e-15	0.614599	0.937	0.608	1.67726e-10
CKAP5	1.16123e-14	0.609544	0.794	0.335	3.01793e-10
ARHGAP11A	2.85899e-49	0.607699	0.651	0.042	7.43022e-45
RPA3	2.54328e-19	0.605186	0.873	0.378	6.60973e-15
DHFR	1.06052e-57	0.604136	0.73	0.042	2.75619e-53
ANP32E	2.66552e-11	0.602391	0.825	0.507	6.92743e-07
RANBP1	1.00515e-16	0.60136	0.937	0.584	2.61227e-12
KIFC1	4.83527e-79	0.597172	0.698	0.006	1.25664e-74
HELLS	9.05545e-40	0.593978	0.651	0.065	2.35342e-35
SMC3	1.78136e-15	0.590153	0.937	0.529	4.62957e-11
MND1	2.64101e-45	0.588683	0.571	0.032	6.86373e-41
DDX39A	1.6085e-13	0.588531	0.841	0.438	4.18033e-09
NUCB2	3.74797e-18	0.587127	0.778	0.265	9.74061e-14
FEN1	4.21141e-37	0.582297	0.651	0.081	1.0945e-32
NSD2	1.00032e-22	0.580637	0.698	0.172	2.59972e-18
CBX5	1.32423e-17	0.574838	0.905	0.412	3.44155e-13
CENPX	2.0723e-13	0.573613	0.762	0.349	5.38569e-09
BRCA2	6.77601e-24	0.572601	0.762	0.186	1.76102e-19
NCAPG2	1.5852e-47	0.56957	0.683	0.053	4.11979e-43
RRM1	3.40589e-25	0.566569	0.762	0.19	8.85156e-21
CARHSP1	4.02748e-19	0.562775	0.778	0.261	1.0467e-14
RACGAP1	5.89074e-35	0.562179	0.603	0.065	1.53094e-30
HNRNPAB	1.73965e-12	0.55241	0.889	0.59	4.52117e-08
FADS1	1.59794e-17	0.550133	0.714	0.238	4.15288e-13
BARD1	1.30944e-22	0.545989	0.73	0.182	3.4031e-18
CENPW	1.954e-21	0.545521	0.698	0.18	5.07826e-17
MELK	2.06135e-58	0.545514	0.635	0.022	5.35725e-54
BUB3	1.2271e-11	0.544574	0.841	0.537	3.18911e-07
CENPN	3.94679e-42	0.543022	0.683	0.067	1.02573e-37
NCAPD3	4.4359e-27	0.542013	0.714	0.145	1.15285e-22
GAPDH	6.52551e-18	0.539914	1	1	1.69591e-13
SPC25	4.16066e-48	0.53965	0.476	0.01	1.08132e-43
CDCA2	3.14587e-55	0.538698	0.508	0.006	8.17581e-51
TCF19	3.23195e-36	0.537312	0.587	0.061	8.39952e-32
JPT1	1.37587e-06	0.533742	0.921	0.687	0.0357575
COX8A	5.7005e-14	0.529702	0.984	0.867	1.4815e-09
PHF19	5.20479e-25	0.529368	0.746	0.182	1.35267e-20
NRM	2.08773e-20	0.522509	0.698	0.186	5.42581e-16
POLD3	2.32077e-26	0.52146	0.762	0.166	6.03146e-22
TFDP1	2.11893e-16	0.52076	0.794	0.309	5.5069e-12
LSM4	1.45702e-13	0.520482	0.937	0.61	3.78664e-09
BRCA1	3.62862e-43	0.517144	0.667	0.057	9.43041e-39
CBX3	1.07437e-14	0.515852	1	0.741	2.79219e-10
RBBP7	1.43822e-13	0.514624	0.857	0.442	3.7378e-09
ORC6	2.45402e-45	0.513851	0.651	0.05	6.37775e-41
PRR11	1.96895e-20	0.513502	0.587	0.129	5.1171e-16
ASRGL1	2.31693e-22	0.511986	0.508	0.081	6.02146e-18
SLBP	3.81093e-13	0.51165	0.746	0.343	9.90422e-09
SLC25A5	1.20694e-14	0.511056	1	0.96	3.13672e-10
PKMYT1	7.66855e-55	0.511005	0.571	0.016	1.99298e-50
PSIP1	2.68228e-13	0.510723	0.794	0.362	6.97097e-09
TGFBI	0.0145229	0.509676	0.968	0.933	1
MYBL2	1.2211e-62	0.503475	0.587	0.008	3.17352e-58
BANF1	2.65308e-13	0.501408	0.984	0.857	6.89509e-09
BUB1B	1.73266e-60	0.499745	0.587	0.01	4.50302e-56
TACC3	1.53891e-15	0.49793	0.73	0.265	3.99947e-11
PSMC3	1.40057e-16	0.496579	0.905	0.41	3.63994e-12
CDCA3	7.2904e-55	0.496383	0.492	0.004	1.8947e-50
LIG1	2.01926e-30	0.496104	0.635	0.091	5.24784e-26
ANAPC11	8.17439e-13	0.493284	0.984	0.749	2.12444e-08
CDCA5	1.75998e-55	0.489195	0.54	0.01	4.574e-51
HAT1	2.56331e-13	0.488449	0.794	0.398	6.66179e-09
FABP5	6.75774e-14	0.485643	0.746	0.279	1.75627e-09
AURKB	4.12968e-59	0.485576	0.556	0.008	1.07326e-54
CHCHD2	2.54301e-14	0.484887	1	0.939	6.60903e-10
FCGR3A	0.00018554	0.482787	0.556	0.317	1
VRK1	3.96493e-19	0.482311	0.778	0.248	1.03045e-14
CTSD	0.00277287	0.479291	0.746	0.618	1
GINS2	1.76601e-29	0.478821	0.508	0.053	4.58969e-25
SNRNP25	2.67845e-10	0.477432	0.714	0.343	6.96103e-06
CCNE2	3.52675e-32	0.471034	0.444	0.03	9.16568e-28
SAE1	2.86452e-15	0.469589	0.762	0.295	7.44461e-11
ZDHHC12	1.35207e-10	0.465689	0.825	0.44	3.51388e-06
KIF22	1.95497e-13	0.465009	0.762	0.317	5.08076e-09
PA2G4	1.13603e-10	0.463229	0.952	0.665	2.95244e-06
ENO1	1.24529e-12	0.461697	1	0.937	3.23638e-08
FOXM1	3.41851e-50	0.461658	0.524	0.014	8.88436e-46
LSM3	5.11218e-13	0.460593	0.937	0.556	1.32861e-08
RETN	0.000128956	0.459414	0.349	0.16	1
DNMT1	4.36756e-10	0.459218	0.952	0.78	1.13509e-05
SGO1	1.1734e-31	0.457291	0.476	0.04	3.04955e-27
HNRNPF	2.42098e-08	0.454793	0.921	0.743	0.000629189
RFC4	2.19171e-34	0.454029	0.603	0.065	5.69603e-30
SUPT16H	4.99528e-11	0.45313	0.921	0.562	1.29822e-06
DTL	4.46867e-43	0.449886	0.508	0.022	1.16136e-38
WEE1	1.71154e-25	0.449292	0.492	0.061	4.44812e-21
KIF4A	9.36612e-51	0.448809	0.524	0.014	2.43416e-46
UBE2S	7.67013e-16	0.448407	0.651	0.192	1.99339e-11
SLFN13	6.47806e-27	0.447245	0.54	0.067	1.68358e-22
E2F8	5.32369e-57	0.444063	0.476	0	1.38357e-52
WDR34	1.12555e-37	0.44298	0.54	0.04	2.9252e-33
MCM6	1.49079e-16	0.441727	0.508	0.119	3.87443e-12
CDT1	1.57629e-42	0.441073	0.524	0.026	4.09662e-38
PLK1	8.19729e-38	0.440154	0.365	0.006	2.13039e-33
HIST2H2AC	9.64328e-10	0.439507	0.524	0.2	2.50619e-05
ITGB3BP	3.56859e-22	0.437481	0.635	0.131	9.27441e-18
CDKN2C	1.44604e-23	0.43705	0.556	0.091	3.75812e-19
SPDL1	8.50504e-35	0.436926	0.635	0.071	2.21038e-30
HIST1H2AJ	7.16408e-36	0.436359	0.444	0.022	1.86187e-31
RFC3	2.13e-34	0.436291	0.603	0.063	5.53566e-30
TTK	2.42235e-53	0.435113	0.571	0.018	6.29544e-49
MCM5	2.34571e-11	0.434983	0.778	0.4	6.09627e-07
SKA3	6.62932e-57	0.434775	0.54	0.008	1.72289e-52
C1QC	0.00065647	0.434262	0.81	0.626	1
NUDT1	6.08001e-15	0.433984	0.714	0.253	1.58013e-10
HAMP	4.07188e-06	0.433714	0.238	0.065	0.105824
LDHA	1.31351e-10	0.433545	1	0.873	3.41368e-06
MTHFD1	7.93394e-12	0.43307	0.651	0.263	2.06195e-07
RNASE2	1.61274e-09	0.431872	0.381	0.111	4.19135e-05
MS4A4A	3.0027e-09	0.429789	0.778	0.384	7.80371e-05
HJURP	3.39445e-47	0.429563	0.46	0.008	8.82183e-43
BRIP1	5.30688e-38	0.428828	0.429	0.016	1.3792e-33
PARP1	1.57524e-10	0.427865	0.937	0.62	4.09389e-06
SNRPD1	2.30562e-10	0.427468	0.905	0.616	5.99208e-06
SHCBP1	1.9511e-28	0.426631	0.603	0.083	5.07071e-24
MSH6	2.59604e-10	0.425409	0.635	0.271	6.74685e-06
C3	0.000825232	0.422784	0.73	0.531	1
PAICS	6.06396e-12	0.421419	0.651	0.263	1.57596e-07
KPNB1	2.57024e-09	0.419514	0.937	0.669	6.67979e-05
HIST1H3B	7.38479e-38	0.41869	0.333	0.002	1.91923e-33
CALM3	1.41344e-07	0.417635	0.794	0.549	0.00367338
TMEM97	1.88093e-12	0.417469	0.587	0.194	4.88836e-08
CHEK1	9.29993e-40	0.417183	0.508	0.028	2.41696e-35
CXCL3	0.314018	0.416784	0.127	0.089	1
KIF20B	3.42641e-13	0.416769	0.762	0.281	8.9049e-09
LYZ	0.0112075	0.415262	1	0.984	1
HNRNPD	1.61166e-14	0.414482	1	0.927	4.18855e-10
MGST3	3.11772e-08	0.414462	0.841	0.594	0.000810264
PPIA	2.53916e-14	0.412943	1	0.994	6.59901e-10
RBBP8	2.32434e-09	0.412771	0.508	0.206	6.04073e-05
SRSF7	1.2763e-05	0.412657	0.984	0.897	0.331697
SPAG5	3.01571e-43	0.4106	0.508	0.022	7.83754e-39
MZT2A	2.9131e-09	0.409231	0.905	0.541	7.57085e-05
HP1BP3	4.36851e-05	0.408359	0.889	0.754	1
UQCRQ	2.05116e-11	0.40729	0.968	0.796	5.33077e-07
GMPS	5.63834e-11	0.406198	0.698	0.323	1.46535e-06
TREM2	6.32492e-06	0.405306	0.778	0.473	0.164378
CLEC11A	2.14561e-05	0.404835	0.444	0.224	0.557621
CENPH	2.43872e-23	0.404552	0.54	0.087	6.33799e-19
UQCC2	1.03502e-13	0.404039	0.81	0.356	2.68992e-09
KIF14	2.63603e-38	0.403274	0.381	0.008	6.85079e-34
COX20	2.12531e-07	0.400599	0.778	0.469	0.00552348
COMMD4	2.72675e-09	0.396582	0.794	0.382	7.08655e-05
CD14	0.000834006	0.39621	0.73	0.556	1
POLR3K	6.08504e-11	0.394958	0.635	0.253	1.58144e-06
MAFB	0.000183502	0.394829	0.667	0.424	1
SLF2	4.82835e-11	0.393787	0.746	0.337	1.25484e-06
TECR	1.53135e-09	0.393343	0.905	0.505	3.97984e-05
SNRPB	2.6541e-09	0.3912	0.889	0.731	6.89774e-05
BLM	6.54226e-37	0.390689	0.556	0.044	1.70027e-32
GLRX5	8.20664e-10	0.388551	0.698	0.347	2.13282e-05
MIS18BP1	2.78703e-06	0.384932	0.952	0.705	0.0724321
SRP9	2.98212e-08	0.383858	0.952	0.814	0.000775024
CCDC34	2.47291e-26	0.382896	0.492	0.057	6.42686e-22
SKA2	1.41627e-11	0.380682	0.698	0.281	3.68076e-07
CSE1L	8.29823e-13	0.380175	0.762	0.303	2.15663e-08
MCM10	1.39932e-39	0.379802	0.444	0.016	3.6367e-35
YWHAQ	1.11395e-10	0.379142	0.937	0.693	2.89504e-06
SRSF3	3.27601e-07	0.378793	1	0.905	0.00851402
LDHB	7.07951e-08	0.377535	0.937	0.808	0.00183989
EXOSC8	2.11352e-10	0.375894	0.746	0.331	5.49284e-06
C19orf48	1.28293e-13	0.375211	0.508	0.139	3.3342e-09
MARCKS	0.00104992	0.375162	0.778	0.592	1
XRCC5	1.2939e-09	0.375086	0.984	0.869	3.36271e-05
PRKDC	3.26806e-08	0.373527	0.889	0.566	0.000849337
ICMT	2.06051e-13	0.371675	0.635	0.208	5.35506e-09
SHMT1	2.51399e-22	0.370544	0.46	0.063	6.53361e-18
A2M	0.000653402	0.370445	0.698	0.473	1
CD99	6.36145e-06	0.369108	0.873	0.578	0.165328
CTCF	4.12094e-08	0.368742	0.651	0.331	0.00107099
FCGBP	0.00834664	0.367586	0.381	0.222	1
INCENP	6.19911e-27	0.367249	0.508	0.059	1.61109e-22
TUBG1	1.14587e-22	0.366962	0.683	0.143	2.97799e-18
RTN3	1.11996e-08	0.3658	0.968	0.695	0.000291066
CDC6	5.99417e-41	0.365264	0.476	0.02	1.55783e-36
HPRT1	3.46931e-07	0.364356	0.81	0.505	0.0090164
TPR	1.03436e-08	0.364154	0.952	0.681	0.00026882
YEATS4	2.91525e-10	0.363085	0.587	0.242	7.57644e-06
ATP1B3	3.129e-09	0.362732	0.921	0.642	8.13196e-05
CACYBP	2.9383e-09	0.362569	0.952	0.703	7.63636e-05
POLQ	1.92893e-33	0.362231	0.413	0.02	5.0131e-29
VSIG4	0.000317923	0.362207	0.492	0.287	1
TIMELESS	5.33997e-24	0.359399	0.476	0.061	1.3878e-19
SVIP	1.28772e-10	0.359146	0.651	0.285	3.34666e-06
CENPJ	4.11335e-24	0.359059	0.635	0.111	1.06902e-19
ADM	0.000311101	0.358564	0.27	0.109	1
PLP2	1.14517e-05	0.356598	0.889	0.695	0.297617
TPI1	2.89763e-08	0.356295	0.984	0.962	0.000753065
WDHD1	2.66124e-26	0.354744	0.476	0.053	6.91631e-22
PARPBP	1.20075e-30	0.354638	0.508	0.048	3.12064e-26
TOPBP1	2.53175e-10	0.353907	0.746	0.325	6.57976e-06
APOC1	0.0078928	0.349432	0.587	0.408	1
TROAP	4.10292e-34	0.349381	0.333	0.006	1.06631e-29
CASP8AP2	6.41385e-08	0.349346	0.603	0.295	0.0016669
SAP30	1.61841e-07	0.348892	0.714	0.341	0.00420608
UHRF1	5.30136e-45	0.347757	0.524	0.022	1.37777e-40
KIF18A	4.45953e-23	0.347415	0.349	0.028	1.15899e-18
HLTF	8.66048e-11	0.346897	0.683	0.269	2.25077e-06
P4HB	1.0559e-08	0.346389	0.968	0.65	0.000274419
TRA2B	0.0014438	0.345035	0.905	0.786	1
PPM1G	1.56955e-07	0.34479	0.873	0.632	0.00407909
BRI3BP	8.08603e-08	0.343226	0.683	0.376	0.00210148
APLP2	0.00265172	0.343126	0.952	0.816	1
HADH	5.45536e-10	0.342607	0.714	0.341	1.41779e-05
IMPDH2	1.72683e-09	0.342236	0.81	0.416	4.48786e-05
DCK	2.37342e-08	0.342024	0.921	0.576	0.000616827
ACAT2	2.89041e-13	0.341894	0.619	0.19	7.51188e-09
RPS27L	9.28708e-07	0.341887	0.952	0.745	0.0241362
LAIR1	3.79445e-09	0.341344	0.81	0.418	9.8614e-05
WDR76	5.54548e-27	0.340868	0.429	0.038	1.44122e-22
FUS	1.7596e-05	0.340133	0.952	0.77	0.457302
CHAF1A	2.34883e-18	0.339785	0.54	0.113	6.10437e-14
CCDC14	9.65789e-12	0.339403	0.619	0.226	2.50999e-07
NOP56	3.24122e-08	0.338641	0.762	0.434	0.00084236
POLE3	6.4557e-10	0.338034	0.762	0.366	1.67777e-05
ERH	4.43638e-07	0.33702	1	0.792	0.0115297
MSH2	5.85631e-10	0.336581	0.651	0.261	1.522e-05
PTGES3	1.76684e-07	0.335656	0.968	0.867	0.00459184
HNRNPA3	1.23854e-08	0.335627	0.984	0.909	0.000321884
UBB	2.25732e-05	0.334037	1	0.998	0.586655
KNSTRN	1.09274e-15	0.333618	0.413	0.077	2.83991e-11
MZT1	3.27371e-08	0.333538	0.619	0.277	0.000850804
ECT2	1.01795e-21	0.332862	0.46	0.061	2.64555e-17
RAD51C	4.81431e-11	0.33246	0.508	0.16	1.25119e-06
CDC45	2.55146e-28	0.332087	0.381	0.024	6.63099e-24
FGD5-AS1	2.29178e-06	0.331737	0.873	0.602	0.059561
MRPL51	8.07186e-05	0.331193	0.825	0.634	1
HNRNPUL1	9.30583e-08	0.331129	0.81	0.493	0.00241849
IFI27L1	2.58497e-16	0.330878	0.46	0.091	6.71807e-12
LSM5	3.23014e-07	0.330529	0.873	0.513	0.0083948
HNRNPA2B1	2.27467e-09	0.329475	1	1	5.91163e-05
GINS1	3.95533e-42	0.329455	0.524	0.026	1.02795e-37
CTNNAL1	4.69601e-15	0.328395	0.476	0.105	1.22045e-10
RIF1	2.71048e-08	0.328351	0.73	0.35	0.000704426
SUZ12	6.48293e-05	0.327399	0.857	0.642	1
C12orf75	0.00157068	0.326955	0.603	0.4	1
HIST1H2AE	9.93562e-12	0.326737	0.365	0.077	2.58217e-07
RPA1	2.52734e-14	0.326606	0.683	0.228	6.5683e-10
SAC3D1	4.3259e-12	0.326526	0.508	0.154	1.12426e-07
HSDL2	4.96628e-07	0.326343	0.571	0.255	0.0129069
CENPP	7.09994e-19	0.326131	0.365	0.048	1.8452e-14
ATL3	4.87751e-10	0.32608	0.683	0.295	1.26762e-05
TPGS2	1.57713e-09	0.325425	0.714	0.329	4.0988e-05
S100A9	0.0014022	0.323788	0.397	0.22	1
DCTPP1	5.14939e-06	0.323208	0.714	0.459	0.133828
NAA38	2.73765e-06	0.322702	0.746	0.489	0.0711489
DIAPH3	4.11519e-33	0.32261	0.365	0.012	1.0695e-28
EIF5A	3.30032e-06	0.322086	0.905	0.683	0.0857719
KNTC1	3.77424e-16	0.320937	0.46	0.089	9.80887e-12
CALM2	3.65202e-07	0.320836	1	0.962	0.00949123
ACTL6A	3.57454e-12	0.320752	0.651	0.232	9.28987e-08
VMA21	7.81892e-07	0.320254	0.841	0.507	0.0203206
CCDC18	2.37227e-11	0.319578	0.571	0.19	6.1653e-07
NAP1L4	9.2017e-08	0.319062	0.794	0.469	0.00239143
CDC25B	7.20707e-19	0.318807	0.365	0.046	1.87304e-14
TIMM10	3.55035e-08	0.317909	0.762	0.404	0.000922701
RFWD3	4.44202e-16	0.31664	0.413	0.073	1.15444e-11
GPAA1	1.13523e-10	0.316484	0.746	0.335	2.95034e-06
PTMS	0.00585357	0.316481	0.794	0.566	1
DSN1	3.5215e-17	0.314788	0.492	0.099	9.15202e-13
NT5DC2	6.11778e-15	0.314511	0.429	0.083	1.58995e-10
NME1	1.18209e-05	0.313883	0.746	0.471	0.307214
TPRKB	2.16396e-07	0.312938	0.857	0.493	0.00562391
NDUFB1	1.05832e-06	0.31235	0.968	0.701	0.0275048
CDKN2AIP	6.51021e-11	0.31218	0.651	0.246	1.69194e-06
CEP295	1.03309e-11	0.311698	0.587	0.196	2.68489e-07
H1FX	0.000759628	0.310248	0.794	0.58	1
G3BP1	2.81146e-07	0.310054	0.81	0.507	0.00730671
VDAC3	2.75681e-06	0.309374	0.81	0.586	0.0716467
CTDSPL2	2.22884e-08	0.309239	0.587	0.253	0.000579252
LSM2	1.22443e-06	0.308427	0.794	0.497	0.0318217
UBE2A	1.00684e-05	0.307935	0.873	0.65	0.261667
E2F7	4.68072e-33	0.30698	0.365	0.012	1.21647e-28
MRPL57	9.56274e-06	0.306613	0.889	0.651	0.248526
NETO2	5.98742e-16	0.306432	0.429	0.077	1.55607e-11
DEPDC1	2.96906e-47	0.306262	0.429	0.004	7.71629e-43
CEP78	2.37217e-12	0.30616	0.571	0.178	6.16503e-08
NRGN	2.34782e-08	0.305946	0.413	0.139	0.000610175
SASS6	8.1546e-22	0.305703	0.46	0.061	2.1193e-17
PARP2	4.15456e-17	0.304544	0.508	0.109	1.07973e-12
BTG3	1.82946e-09	0.30444	0.619	0.255	4.75458e-05
HDAC2	4.61027e-06	0.304287	0.825	0.519	0.119816
HAUS2	3.84286e-08	0.304282	0.571	0.24	0.000998722
RPL39L	1.9742e-21	0.304158	0.429	0.055	5.13076e-17
IFI16	4.84589e-06	0.303927	0.968	0.909	0.12594
COPS3	5.05643e-06	0.3039	0.857	0.582	0.131412
TTF2	1.91996e-09	0.303853	0.603	0.24	4.98979e-05
DEGS1	1.18555e-06	0.303833	0.952	0.727	0.0308113
MCM8	2.59894e-27	0.303154	0.413	0.032	6.75439e-23
CENPA	1.07676e-37	0.302761	0.349	0.004	2.79839e-33
SIGMAR1	2.7849e-06	0.302106	0.635	0.325	0.0723768
HDGF	3.20789e-06	0.30175	0.698	0.384	0.0833698
BAZ1B	2.94426e-05	0.301662	0.635	0.406	0.765183
RFC2	7.96359e-08	0.299686	0.667	0.349	0.00206966
SUMO3	4.7309e-06	0.299439	0.921	0.691	0.122951
HIRIP3	2.03015e-17	0.299412	0.54	0.115	5.27616e-13
TMED9	1.00464e-06	0.299266	0.889	0.719	0.0261096
PRDX3	2.65167e-05	0.298101	0.905	0.766	0.689141
GPSM2	3.14402e-18	0.297508	0.317	0.034	8.171e-14
PFKL	1.34107e-05	0.297376	0.778	0.558	0.348532
NDUFB6	3.83894e-08	0.297307	0.905	0.59	0.000997703
RFC5	2.06379e-24	0.296502	0.492	0.061	5.36358e-20
HERC5	5.46159e-12	0.295551	0.587	0.178	1.41941e-07
RBBP4	2.92761e-06	0.295235	0.794	0.513	0.0760857
PRDX4	8.84817e-08	0.294937	0.778	0.384	0.00229955
MAPRE1	7.59926e-08	0.294933	0.937	0.622	0.00197497
NPC2	0.000658832	0.294664	1	0.964	1
TMEM160	1.85517e-06	0.294408	0.81	0.509	0.0482141
SRSF2	1.43394e-08	0.294245	0.952	0.873	0.000372666
GIMAP4	0.000273031	0.29159	0.619	0.378	1
SMC6	7.07178e-08	0.290009	0.524	0.224	0.00183789
ILF2	9.0308e-06	0.289914	0.857	0.622	0.234701
PSAP	0.0568595	0.289707	1	0.964	1
OLFML3	1.50517e-06	0.288668	0.476	0.19	0.0391178
NTAN1	4.94184e-09	0.288005	0.635	0.273	0.000128433
CDK4	8.70527e-07	0.287633	0.667	0.362	0.0226241
USP48	1.58406e-07	0.287276	0.778	0.455	0.00411681
NDUFA2	4.177e-06	0.287182	0.952	0.735	0.108556
PLAC8	0.0091064	0.286808	0.778	0.63	1
SSRP1	1.7652e-08	0.286523	0.714	0.337	0.000458758
EBP	1.4011e-07	0.286388	0.444	0.176	0.00364132
AMD1	0.000159596	0.286223	0.81	0.517	1
CBR3	6.38332e-16	0.285666	0.397	0.067	1.65896e-11
LGALS1	0.821864	0.284904	0.952	0.935	1
ACADVL	2.15074e-06	0.284327	0.857	0.584	0.0558955
POLD2	8.3241e-08	0.284268	0.556	0.25	0.00216335
GUSB	2.07297e-07	0.284147	0.73	0.39	0.00538744
CDK5RAP2	1.82478e-08	0.283411	0.476	0.17	0.000474243
COX6C	1.62594e-06	0.283359	1	0.901	0.0422567
ACOT7	2.71736e-13	0.283295	0.619	0.192	7.06214e-09
PIGX	1.50832e-13	0.282844	0.476	0.119	3.91997e-09
CDCA7L	1.05823e-12	0.282718	0.587	0.186	2.75023e-08
TMEM109	6.69636e-05	0.282522	0.905	0.723	1
ERP29	0.000679456	0.282514	0.937	0.768	1
NUP107	2.02094e-07	0.281704	0.46	0.184	0.00525223
SLC25A39	1.25295e-05	0.280857	0.81	0.533	0.325629
FDPS	4.55936e-06	0.279781	0.651	0.376	0.118493
XRCC6	3.44711e-05	0.279705	0.952	0.79	0.895868
CDCA7	1.51236e-23	0.27948	0.381	0.034	3.93048e-19
DNAJC1	2.12051e-07	0.279439	0.619	0.273	0.00551099
KIF2A	9.45318e-05	0.279421	0.635	0.424	1
NEIL3	5.95064e-34	0.279218	0.333	0.006	1.54651e-29
CENPQ	9.2354e-13	0.279123	0.397	0.087	2.40019e-08
ARL2	3.34284e-07	0.278479	0.778	0.43	0.00868771
IER3	0.470275	0.278146	0.825	0.842	1
MEA1	2.00211e-05	0.278022	0.762	0.497	0.520329
HNRNPA0	3.92162e-06	0.277951	0.952	0.723	0.101919
RNPEP	6.48186e-05	0.277608	0.683	0.406	1
RB1	2.93143e-05	0.277101	0.81	0.545	0.761848
SRSF1	7.30897e-06	0.277095	0.794	0.525	0.189953
HNRNPR	4.79239e-06	0.277032	0.905	0.741	0.124549
CCT5	1.21999e-06	0.276366	0.937	0.685	0.0317062
ADAM9	1.92008e-05	0.276273	0.54	0.271	0.49901
UXT	2.24697e-06	0.276062	0.921	0.65	0.0583965
EXO1	2.97237e-45	0.275879	0.397	0.002	7.7249e-41
TXNL4A	1.2807e-05	0.275297	0.889	0.612	0.332842
SNRPG	1.92525e-05	0.274893	0.937	0.758	0.500353
MTFR2	5.24568e-26	0.274848	0.397	0.032	1.3633e-21
PKM	1.11121e-06	0.274811	0.984	0.923	0.0288793
CYB5B	1.18364e-08	0.27442	0.794	0.39	0.000307617
ANP32A	1.66226e-05	0.274053	0.937	0.804	0.432005
EED	7.33985e-09	0.273975	0.54	0.202	0.000190755
ACAT1	4.19503e-06	0.273328	0.651	0.352	0.109025
CDKN2D	2.97744e-11	0.273141	0.349	0.077	7.73806e-07
NUP37	4.23532e-08	0.271816	0.524	0.208	0.00110072
SLFN11	3.48795e-06	0.27046	0.667	0.364	0.0906483
HIST1H2BH	3.41676e-21	0.270423	0.333	0.028	8.87982e-17
SPTSSA	6.62358e-05	0.26993	0.762	0.503	1
BLOC1S1	3.53109e-05	0.269625	0.921	0.719	0.917696
RPA2	0.000222563	0.269488	0.667	0.44	1
GIMAP7	9.51155e-06	0.269131	0.476	0.216	0.247196
HAUS1	5.67124e-08	0.268795	0.683	0.307	0.0014739
KDELC2	2.95106e-15	0.267447	0.444	0.091	7.66952e-11
C21orf58	4.99924e-31	0.267171	0.381	0.018	1.29925e-26
NR2C2AP	2.45933e-11	0.266233	0.429	0.113	6.39156e-07
VKORC1	9.68501e-06	0.266222	0.762	0.481	0.251704
MRPL17	5.64336e-09	0.265245	0.698	0.329	0.000146665
CCDC167	4.61456e-06	0.265224	0.508	0.222	0.119928
MGST1	0.00158617	0.26437	0.556	0.333	1
LSM7	1.6366e-05	0.264181	0.81	0.564	0.425336
POLR2I	4.22917e-05	0.26412	0.667	0.424	1
AKR7A2	1.2807e-07	0.263878	0.73	0.4	0.00332842
PAQR4	5.81606e-20	0.263598	0.46	0.069	1.51154e-15
CCL3L1	0.554447	0.263106	0.635	0.578	1
MFSD14B	7.2619e-08	0.263063	0.54	0.222	0.00188729
MASTL	2.77157e-17	0.262761	0.492	0.093	7.20304e-13
HACD3	2.21132e-07	0.26259	0.635	0.303	0.00574699
CYBRD1	3.94962e-06	0.261936	0.762	0.448	0.102647
CD81	0.00446114	0.261851	0.825	0.612	1
DLEU2	6.02061e-10	0.261845	0.413	0.115	1.5647e-05
SLC29A1	3.25134e-08	0.261642	0.619	0.263	0.00084499
NENF	6.16445e-07	0.261054	0.841	0.479	0.0160208
PPP1R15A	0.648705	0.260583	0.667	0.644	1
CEBPG	2.53887e-05	0.260285	0.73	0.432	0.659828
NUDC	2.53105e-05	0.260233	0.873	0.598	0.657795
UNG	9.07331e-08	0.26017	0.333	0.103	0.00235806
HIST1H2BG	9.83173e-09	0.258587	0.492	0.178	0.000255517
ASH2L	1.58349e-05	0.258505	0.635	0.331	0.411533
OIP5	2.4819e-27	0.258496	0.365	0.022	6.45021e-23
SNRPD3	1.37042e-05	0.258041	0.921	0.762	0.35616
YBX1	8.04603e-05	0.258028	1	0.905	1
LRR1	1.6235e-10	0.257819	0.492	0.154	4.21931e-06
CCP110	5.64306e-10	0.257212	0.46	0.141	1.46657e-05
CD9	0.0466052	0.256758	0.683	0.584	1
HIST1H2BJ	1.80909e-05	0.256098	0.206	0.057	0.470165
FCGR1A	0.00083517	0.255793	0.587	0.368	1
GGCT	2.9324e-06	0.255604	0.667	0.331	0.0762102
PLK4	5.79323e-26	0.25534	0.381	0.028	1.5056e-21
SPCS3	0.000180921	0.255139	0.921	0.768	1
AKR1B1	0.000115563	0.255024	0.889	0.679	1
SLC43A3	5.00935e-08	0.254566	0.476	0.17	0.00130188
RDX	3.62934e-09	0.254531	0.73	0.301	9.4323e-05
DBF4	1.11037e-08	0.254486	0.524	0.196	0.000288575
TEX30	1.42611e-07	0.254155	0.381	0.127	0.00370632
MRPL37	1.18841e-08	0.253831	0.698	0.321	0.000308855
ACADM	5.72425e-05	0.252308	0.698	0.432	1
CAPG	0.00012872	0.251778	0.984	0.947	1
PGP	1.90721e-07	0.251622	0.603	0.289	0.00495664
PDIA6	4.63875e-05	0.251571	0.921	0.798	1
RECQL	5.1896e-06	0.250927	0.762	0.459	0.134872
DDX50	1.76582e-09	0.250909	0.698	0.299	4.58918e-05
UBR7	6.33029e-10	0.25016	0.413	0.115	1.64518e-05
BTG1	0.109044	-0.250371	0.968	0.933	1
NUB1	0.372799	-0.251328	0.762	0.669	1
GSN	0.0607832	-0.251464	0.968	0.972	1
SLAMF8	0.121323	-0.251693	0.397	0.436	1
SRGN	0.0352867	-0.252031	1	0.994	1
C4orf3	0.00228001	-0.253054	0.889	0.84	1
RIPK2	0.119536	-0.253958	0.476	0.537	1
IFIH1	0.0889738	-0.254399	0.444	0.493	1
RSRP1	0.0366133	-0.254493	0.778	0.756	1
RPS19	5.18337e-07	-0.254957	1	1	0.0134711
BCL2L11	0.0254543	-0.256821	0.286	0.386	1
CPVL	0.161376	-0.257074	0.857	0.846	1
MYOF	0.00799016	-0.257813	0.556	0.61	1
SGK1	0.1535	-0.259123	0.873	0.897	1
PLEK	0.0848012	-0.259774	0.968	0.927	1
USP15	0.00276324	-0.259869	0.587	0.699	1
RPL12	6.64235e-06	-0.260041	1	0.998	0.172628
DUSP4	0.0204087	-0.260308	0.048	0.149	1
ARL5B	0.405834	-0.260547	0.238	0.263	1
CMTM6	0.0158514	-0.260739	0.937	0.867	1
CFP	0.0443478	-0.260752	0.159	0.259	1
RNASE6	0.0354032	-0.261219	0.841	0.873	1
SAMD9L	0.101953	-0.261728	0.778	0.725	1
HERPUD1	0.206258	-0.261961	0.937	0.871	1
IRF1	0.995618	-0.262562	0.476	0.398	1
IFIT2	0.624875	-0.262718	0.397	0.354	1
ATF3	0.555912	-0.26419	0.619	0.507	1
LYN	0.00186123	-0.264289	0.905	0.846	1
PPA1	0.00742051	-0.264836	0.841	0.863	1
AQP3	0.00552466	-0.266761	0.127	0.269	1
AKAP9	0.00890792	-0.266847	0.651	0.687	1
RSAD2	0.990984	-0.268	0.238	0.214	1
RPL19	2.42366e-07	-0.268825	1	1	0.00629884
RPL26	8.15158e-05	-0.270139	0.968	0.962	1
CD86	0.00323962	-0.270399	0.937	0.875	1
NEAT1	0.046841	-0.270854	0.905	0.798	1
RPL23A	1.48376e-06	-0.271648	1	0.996	0.0385613
ICAM1	0.0202539	-0.27174	0.492	0.584	1
XBP1	0.104065	-0.272127	0.73	0.646	1
CD40	0.10057	-0.27261	0.444	0.469	1
PARM1	0.00586154	-0.273841	0.302	0.432	1
GRINA	0.0205052	-0.274053	0.635	0.681	1
RPS23	2.25302e-08	-0.275325	1	1	0.000585537
FCER1G	0.000109114	-0.276055	1	0.988	1
CD48	0.0506186	-0.277032	0.73	0.752	1
SRSF5	0.00129454	-0.278354	0.889	0.885	1
ITGAX	0.00132675	-0.278693	0.238	0.418	1
EEF1A1	2.07883e-09	-0.278927	1	1	5.40267e-05
IVNS1ABP	0.0598635	-0.279251	0.714	0.663	1
FPR1	0.0309925	-0.279841	0.857	0.832	1
MYL12A	0.000186771	-0.279853	0.984	0.98	1
IL13RA1	0.00495131	-0.280348	0.968	0.895	1
BTN2A2	0.000120126	-0.282616	0.175	0.392	1
CD80	0.00123862	-0.283012	0.127	0.293	1
LY86	0.00189886	-0.283775	0.873	0.879	1
RPS11	2.3328e-06	-0.28509	1	1	0.0606272
SERPINB1	0.0108002	-0.285626	0.794	0.808	1
RPL35A	1.60304e-06	-0.28758	1	0.994	0.0416614
DUSP5	0.378947	-0.288092	0.317	0.333	1
DAPP1	0.00738052	-0.288419	0.508	0.608	1
NACA	1.81033e-06	-0.288592	0.968	0.99	0.0470485
CD55	0.0876202	-0.288719	0.508	0.566	1
TXNIP	0.00472498	-0.288747	0.968	0.978	1
RPS27A	2.69758e-08	-0.288924	1	0.998	0.000701074
PTPRC	1.20308e-05	-0.290343	1	0.978	0.312669
RPL5	8.26015e-08	-0.290452	1	0.998	0.00214673
TNFAIP8	0.0015095	-0.29099	0.873	0.844	1
KDM6B	0.000557211	-0.291303	0.079	0.277	1
DDX5	1.45669e-07	-0.291379	1	1	0.00378579
HLA-DOA	0.000320769	-0.29189	0.778	0.848	1
RPL37	1.53948e-07	-0.292238	1	0.998	0.00400094
PPP1R14A	0.016341	-0.293987	0.286	0.442	1
RGS1	0.0825675	-0.29448	0.968	0.941	1
EIF1	1.25989e-06	-0.294623	1	1	0.0327434
XAF1	0.027489	-0.294737	0.778	0.758	1
RPL30	1.00404e-09	-0.296199	1	1	2.60941e-05
IL18	0.00378652	-0.296239	0.857	0.851	1
PLAUR	0.373308	-0.298897	0.698	0.497	1
SLAMF7	0.0391768	-0.299782	0.111	0.22	1
B3GNT5	0.131975	-0.300384	0.762	0.699	1
ZFAND5	0.113305	-0.301397	0.905	0.859	1
HMOX1	0.046889	-0.301591	0.444	0.501	1
FOSB	0.508883	-0.302956	0.698	0.665	1
RPS29	2.24082e-09	-0.303525	1	0.996	5.82366e-05
RPL31	1.66672e-09	-0.30405	1	1	4.33163e-05
ZNF331	0.792325	-0.304437	0.254	0.212	1
WARS	0.0582037	-0.305527	0.587	0.602	1
P2RY13	0.0015003	-0.306407	0.857	0.901	1
RPL13A	6.72103e-09	-0.306682	1	1	0.000174673
BCL2A1	0.294356	-0.306972	0.587	0.586	1
SKIL	0.00459466	-0.307025	0.81	0.816	1
PTPRE	0.0145978	-0.308521	0.492	0.562	1
PMAIP1	0.442913	-0.310448	0.397	0.442	1
RPL11	1.63759e-09	-0.310993	1	1	4.25593e-05
GABARAPL1	0.00842672	-0.311468	0.27	0.39	1
UBL3	0.00466727	-0.311695	0.667	0.715	1
ARL4C	0.0139813	-0.312909	0.254	0.368	1
RPS13	4.53033e-08	-0.316116	1	0.998	0.00117739
RPL18	4.68901e-08	-0.316134	1	1	0.00121863
SOCS3	0.0518402	-0.316269	0.349	0.446	1
TYMP	0.00829741	-0.316972	0.762	0.798	1
RPS14	2.73458e-10	-0.317351	1	1	7.1069e-06
TANK	0.00814915	-0.31754	0.571	0.622	1
HLA-DQA2	0.445902	-0.317594	0.365	0.362	1
2022-03-01	0.000497582	-0.318531	0.905	0.889	1
GABARAPL2	0.00153301	-0.318727	0.889	0.838	1
MX1	0.210294	-0.31877	0.651	0.687	1
TYROBP	3.50027e-07	-0.321143	1	0.994	0.00909686
LAMP3	0.0639476	-0.321903	0.079	0.16	1
CH25H	0.104926	-0.32375	0.063	0.129	1
IL10RA	0.000389711	-0.32613	0.413	0.55	1
IGSF6	5.1275e-05	-0.3264	0.968	0.978	1
RPL27A	1.2327e-10	-0.326575	1	1	3.20365e-06
NAMPT	0.396648	-0.329043	0.571	0.541	1
CD74	1.60174e-10	-0.333957	1	1	4.16276e-06
PPP1R15B	0.151927	-0.334469	0.492	0.509	1
IL16	0.00120883	-0.334584	0.571	0.608	1
RASGEF1B	0.0543498	-0.334831	0.286	0.368	1
ADGRE5	0.00136565	-0.335531	0.381	0.529	1
CSF2RA	0.00112411	-0.336886	0.794	0.79	1
CISH	0.0147558	-0.337307	0.556	0.586	1
GBP1	0.243093	-0.339579	0.492	0.493	1
CST3	0.000307091	-0.33995	1	0.998	1
REL	0.0029766	-0.340085	0.714	0.731	1
OTUD1	0.532219	-0.341738	0.317	0.303	1
MYADM	0.00904842	-0.347059	0.619	0.683	1
VASP	0.000348009	-0.348732	0.762	0.812	1
MCL1	0.005459	-0.349908	0.873	0.883	1
CDKN1A	0.0694799	-0.349912	0.635	0.683	1
PKIB	0.00159382	-0.350867	0.81	0.836	1
NFKB1	0.00524533	-0.351168	0.349	0.471	1
AC092809.2	0.00154359	-0.352169	0.365	0.523	1
SP110	0.000693626	-0.352212	0.603	0.707	1
CTSH	1.32412e-07	-0.353704	0.984	0.98	0.00344127
MAFF	0.0229114	-0.354542	0.175	0.291	1
RPL34	3.72614e-10	-0.354769	1	0.994	9.68387e-06
HLA-DQB2	0.0443513	-0.360171	0.127	0.24	1
DDIT4	0.00568307	-0.36421	0.619	0.655	1
RPL10	6.14076e-13	-0.364411	1	1	1.59592e-08
JUNB	0.000285016	-0.364668	0.952	0.954	1
SOD2	0.170796	-0.365993	0.413	0.457	1
VEGFA	0.0407273	-0.369522	0.302	0.362	1
PRCP	8.24604e-05	-0.370454	0.81	0.79	1
LCP2	0.000167515	-0.371605	0.698	0.794	1
BASP1	5.48567e-05	-0.372891	0.698	0.826	1
ISG15	0.550772	-0.373991	0.714	0.669	1
LGALS3	0.305589	-0.374331	0.667	0.648	1
RNASET2	5.3638e-07	-0.375938	0.873	0.941	0.01394
MALAT1	1.20346e-08	-0.380435	1	1	0.000312768
PICALM	3.02747e-08	-0.38092	0.937	0.962	0.00078681
HLA-DRB1	7.46676e-11	-0.382112	1	1	1.94054e-06
FILIP1L	0.0099353	-0.383961	0.698	0.703	1
TRIM22	0.00018977	-0.384202	0.667	0.752	1
SCIMP	0.000173534	-0.386232	0.429	0.582	1
HLA-DRB5	9.02147e-05	-0.38777	0.714	0.8	1
NR4A2	0.160087	-0.388107	0.349	0.404	1
RPL9	7.50827e-12	-0.388564	1	0.996	1.95132e-07
RGS2	0.236485	-0.388832	0.841	0.806	1
CHMP1B	0.0144551	-0.388954	0.476	0.562	1
CLEC4F	0.00616413	-0.389693	0.159	0.295	1
HLA-DOB	3.74469e-05	-0.397119	0.206	0.451	0.973207
NAAA	0.00036111	-0.39858	0.619	0.669	1
HLA-DMA	1.18069e-08	-0.398865	0.968	1	0.000306848
IFIT1	0.672377	-0.399468	0.302	0.295	1
NLRP3	0.23046	-0.401505	0.429	0.451	1
IL7R	0.178662	-0.40448	0.175	0.238	1
ARL6IP5	1.24303e-06	-0.411827	0.968	0.952	0.032305
HLA-DRA	5.20762e-15	-0.413012	1	1	1.35341e-10
CLIC2	6.55926e-06	-0.414028	0.365	0.584	0.170469
TIPARP	0.00858325	-0.415643	0.397	0.533	1
AHR	0.000167409	-0.420928	0.746	0.806	1
LST1	3.80234e-08	-0.422385	0.937	0.982	0.000988189
RPS27	1.34694e-14	-0.423326	1	1	3.50057e-10
CYTIP	0.00109326	-0.431063	0.651	0.707	1
CIITA	1.81629e-06	-0.437932	0.429	0.632	0.0472035
FTH1	1.79113e-10	-0.439305	1	1	4.65498e-06
BIRC3	0.0161209	-0.441188	0.238	0.349	1
NCF2	6.35081e-06	-0.441337	0.571	0.733	0.165051
GGTA1P	1.10937e-05	-0.441806	0.413	0.653	0.288314
FGL2	3.42542e-07	-0.442144	1	0.976	0.00890232
SMAP2	9.333e-08	-0.44593	0.746	0.881	0.00242555
SERPINB9	4.01845e-05	-0.449761	0.492	0.636	1
SLC2A3	0.00322646	-0.450084	0.238	0.37	1
JMJD1C	0.010582	-0.456506	0.73	0.752	1
JAML	4.95064e-06	-0.456611	0.857	0.907	0.128662
PTAFR	0.000250631	-0.456816	0.81	0.818	1
ETS2	2.26889e-06	-0.458926	0.746	0.919	0.0589661
NAPSB	3.11687e-06	-0.46103	0.905	0.964	0.0810044
AHNAK	7.18093e-06	-0.462649	0.667	0.774	0.186625
HSPA6	0.0250859	-0.464534	0.19	0.323	1
RGCC	0.901937	-0.468247	0.492	0.428	1
IL2RG	1.21301e-06	-0.490257	0.556	0.725	0.0315248
MRC1	0.00172367	-0.495104	0.365	0.572	1
CD37	1.8891e-09	-0.496617	0.873	0.923	4.90958e-05
LIMD2	3.07243e-07	-0.498284	0.556	0.776	0.00798495
GPR183	0.00994967	-0.50134	0.937	0.889	1
PDE4B	0.0120785	-0.501411	0.349	0.448	1
PNRC1	2.48769e-06	-0.502937	0.952	0.947	0.0646526
CXCL16	1.29164e-05	-0.506236	0.714	0.78	0.335684
YPEL5	2.57018e-06	-0.507776	0.635	0.756	0.0667965
HLA-DPA1	1.17484e-13	-0.511843	1	1	3.05328e-09
NR4A3	0.0982032	-0.519953	0.286	0.354	1
BTG2	5.36325e-05	-0.527074	0.667	0.816	1
HLA-DMB	2.60569e-13	-0.527758	1	0.986	6.77193e-09
STK17B	4.53524e-08	-0.530424	0.81	0.889	0.00117866
DUSP2	0.233313	-0.532468	0.365	0.408	1
LITAF	1.03105e-07	-0.53257	0.921	0.945	0.0026796
P2RY14	1.58952e-07	-0.538346	0.349	0.612	0.00413101
FCGR2B	2.70692e-06	-0.560731	0.667	0.844	0.0703502
NR4A1	0.051042	-0.568154	0.524	0.564	1
IFITM3	6.59979e-05	-0.573858	0.905	0.929	1
IFITM2	8.18673e-06	-0.59818	0.857	0.913	0.212765
ZFP36	3.68627e-05	-0.60076	0.937	0.972	0.958026
HLA-DQB1	4.36299e-17	-0.614991	1	1	1.1339e-12
CD1E	0.000294132	-0.616749	0.524	0.679	1
CFLAR	4.02341e-08	-0.639616	0.762	0.842	0.00104564
CST7	0.000148395	-0.643565	0.254	0.459	1
CD69	0.0178221	-0.654291	0.603	0.681	1
SYNGR2	6.2716e-10	-0.658485	0.937	0.931	1.62993e-05
CLEC10A	5.26933e-06	-0.659522	0.444	0.655	0.136945
HLA-DPB1	3.82239e-23	-0.66425	1	1	9.93402e-19
CD1C	7.35538e-06	-0.667488	0.587	0.796	0.191159
CEBPD	6.08726e-05	-0.669106	0.873	0.903	1
FCER1A	0.000209872	-0.685351	0.635	0.776	1
LGALS2	2.63164e-06	-0.695658	0.349	0.594	0.0683937
C15orf48	0.25814	-0.706214	0.365	0.384	1
HLA-DQA1	1.62506e-14	-0.720925	0.984	0.998	4.22337e-10
BHLHE40	8.14471e-09	-0.737203	0.635	0.806	0.000211673
LTB	0.000182794	-0.759456	0.444	0.626	1
CCL22	0.00920007	-0.837172	0.063	0.19	1
CD207	0.000661601	-0.851016	0.159	0.374	1
AREG	0.0598856	-0.88098	0.302	0.386	1
CXCL10	0.675217	-0.889755	0.159	0.131	1
WFDC21P	7.08035e-07	-1.37583	0.365	0.588	0.0184011
HBB	0.334012	-1.47288	0.111	0.073	1
CCL17	6.2487e-05	-1.8879	0.333	0.529	1

## Sheet: P21120201.clustercDC2_6_diffgen
gene_id	p_val	avg_logFC	pct.1	pct.2	p_val_adj
LYZ	3.26488e-07	0.746472	0.981	0.986	0.0084851
PPP1R14A	2.13818e-08	0.722564	0.712	0.395	0.000555693
PLAC8	2.96809e-08	0.677244	0.904	0.62	0.000771376
CD2	1.17623e-11	0.614358	0.808	0.386	3.05691e-07
GPR82	9.56618e-11	0.602911	0.808	0.415	2.48615e-06
PRMT7	5.18745e-06	0.558072	0.404	0.167	0.134817
ALDH2	3.67622e-11	0.557146	0.923	0.909	9.55413e-07
CCL5	0.0072537	0.547549	0.308	0.165	1
S100A9	0.00947521	0.537245	0.365	0.227	1
IGFBP7	1.39506e-08	0.535067	0.923	0.624	0.000362561
C12orf75	2.72811e-07	0.524559	0.712	0.393	0.00709009
TRBC2	2.09988e-05	0.478984	0.231	0.068	0.545739
CSTA	0.000118592	0.444559	0.885	0.729	1
GPR160	1.183e-06	0.442266	0.558	0.285	0.0307451
SOCS1	1.662e-05	0.41287	0.769	0.543	0.431936
BLOC1S2	9.08887e-07	0.400367	0.769	0.473	0.0236211
ITM2C	3.38189e-10	0.395293	0.538	0.178	8.78919e-06
SLC44A1	4.99545e-05	0.384786	0.673	0.424	1
PKIB	1.5832e-06	0.383556	0.962	0.82	0.0411457
AP1S2	9.13881e-05	0.378215	0.981	0.853	1
ALOX5AP	4.42859e-07	0.373292	1	0.957	0.0115095
HVCN1	2.68188e-06	0.369465	0.769	0.517	0.0696993
CSF2RB	0.000385421	0.365207	0.577	0.39	1
CISH	3.77667e-05	0.360261	0.788	0.562	0.98152
JAML	2.6918e-06	0.358979	0.981	0.893	0.0699572
CST3	1.37464e-06	0.355677	1	0.998	0.0357254
PGD	2.39971e-06	0.35371	0.788	0.519	0.0623662
DHRS7	3.37237e-05	0.348429	0.923	0.709	0.876444
TRAC	9.27737e-05	0.345148	0.192	0.054	1
HRH2	2.66755e-07	0.337314	0.596	0.285	0.00693269
AXL	7.02579e-05	0.329179	0.885	0.632	1
S100A4	0.000727159	0.328702	1	0.983	1
KCNE5	5.09174e-05	0.328322	0.327	0.128	1
TMEM176B	0.0219761	0.326762	0.673	0.545	1
YWHAH	7.26614e-06	0.325864	1	0.952	0.18884
LST1	0.000101987	0.323837	1	0.975	1
CKB	0.0143734	0.318558	0.558	0.424	1
AC025048.4	1.97672e-09	0.318036	0.5	0.165	5.13731e-05
MYL12A	4.17267e-06	0.315899	1	0.979	0.108443
CCND3	7.3757e-05	0.314711	0.846	0.585	1
ZBED5	7.56079e-07	0.310276	0.615	0.306	0.0196497
GRN	0.000113759	0.307384	0.981	0.986	1
TRPM4	0.050852	0.30703	0.346	0.246	1
CD48	0.000114328	0.306511	0.865	0.738	1
HMGN3	0.00058632	0.306318	0.923	0.771	1
ARPC5	3.83157e-06	0.305251	0.981	0.938	0.0995787
POLR2G	7.08529e-06	0.303896	0.885	0.707	0.18414
SNHG6	0.00137719	0.299633	0.827	0.758	1
CD101	5.66188e-08	0.29871	0.558	0.236	0.00147147
ZNF124	5.46188e-06	0.298394	0.5	0.233	0.141949
PRELID1	6.41458e-05	0.295698	0.962	0.793	1
NAPSB	0.000245037	0.294755	1	0.953	1
KCNMB1	1.09543e-05	0.294691	0.596	0.308	0.284692
SRSF9	6.51449e-05	0.294323	0.942	0.731	1
MYL12B	6.17742e-07	0.292974	1	0.979	0.0160545
P2RY6	3.41616e-05	0.291674	0.885	0.595	0.887825
BRK1	6.80451e-05	0.291501	1	0.953	1
S100A8	0.00790291	0.290931	0.288	0.143	1
UQCRFS1	0.000128747	0.289138	0.846	0.657	1
NSD3	3.50651e-05	0.288756	0.692	0.459	0.911306
CXCR3	4.21242e-05	0.288528	0.462	0.219	1
CD3D	2.50254e-06	0.287708	0.173	0.033	0.0650385
CEACAM4	7.18099e-06	0.28737	0.538	0.266	0.186627
FAM105A	0.00040427	0.286582	0.827	0.69	1
RNASE2	4.58832e-05	0.284685	0.327	0.122	1
ACADM	0.000457897	0.280928	0.673	0.44	1
LGMN	1.64939e-06	0.280816	0.692	0.353	0.0428659
ISCA2	0.000941526	0.280626	0.538	0.322	1
FPR1	0.000283607	0.279674	0.942	0.824	1
ORMDL1	0.000160938	0.278276	0.731	0.506	1
COX7A2L	9.05863e-05	0.277382	0.808	0.603	1
OPN3	0.000256696	0.272947	0.769	0.5	1
PLD4	0.00096519	0.272102	0.923	0.791	1
AK2	0.000168394	0.271576	0.846	0.651	1
EMB	0.000783918	0.27137	0.808	0.64	1
NKG7	0.0127684	0.270797	0.192	0.091	1
APOBEC3C	0.000606582	0.268297	0.827	0.597	1
EAF2	0.000686598	0.267028	0.596	0.362	1
UQCR11	0.000337637	0.265964	0.865	0.752	1
IL18	0.00107024	0.265326	0.904	0.847	1
MLEC	0.000134354	0.264148	0.827	0.601	1
FAM49B	0.000491187	0.262584	0.962	0.903	1
ARHGDIB	3.29084e-06	0.257666	1	1	0.0855257
PRR13	0.000137872	0.257424	0.942	0.804	1
UCP2	0.0157572	0.255833	0.904	0.816	1
PPCS	6.62494e-05	0.255149	0.865	0.624	1
PPA1	0.000507264	0.253969	0.923	0.855	1
EXOSC1	0.000105503	0.253954	0.577	0.32	1
LY86	0.0023032	0.252711	0.942	0.872	1
TM9SF2	0.000493795	0.252582	0.923	0.797	1
PLBD1	0.0101856	0.251679	0.846	0.696	1
SNAPIN	0.00441363	0.251369	0.635	0.45	1
SMDT1	0.00285492	0.250388	0.904	0.771	1
JMJD1C	0.952972	-0.251398	0.827	0.742	1
PCLAF	0.356694	-0.251951	0.115	0.157	1
S100B	0.888055	-0.251979	0.558	0.531	1
CLEC2B	0.0497445	-0.252361	0.673	0.798	1
C3AR1	0.096792	-0.255101	0.327	0.417	1
PTTG1	0.188988	-0.255836	0.231	0.291	1
TACSTD2	0.0914676	-0.256645	0.154	0.25	1
IFNGR1	0.00653407	-0.258955	0.923	0.952	1
CPVL	0.149074	-0.25906	0.846	0.847	1
HNRNPH1	0.00688705	-0.259674	0.692	0.733	1
MIR155HG	0.242182	-0.26054	0.115	0.172	1
TRA2B	0.191747	-0.260707	0.846	0.795	1
CD40	0.10909	-0.260894	0.404	0.473	1
YBX3	0.0346285	-0.262034	0.385	0.498	1
CLU	0.0394984	-0.262143	0.865	0.789	1
RNASE6	0.0372458	-0.262237	0.904	0.866	1
TUBA1A	0.315694	-0.262446	0.808	0.804	1
ATF4	0.00745049	-0.262563	0.596	0.692	1
SMC4	0.181118	-0.264756	0.327	0.388	1
SRSF7	0.122557	-0.265143	0.923	0.905	1
ZBTB10	0.478868	-0.265367	0.269	0.277	1
BHLHE41	0.181876	-0.266035	0.442	0.504	1
TUBB4B	0.0891991	-0.268777	0.481	0.537	1
PELI1	0.0057152	-0.269336	0.096	0.277	1
BTG1	0.129691	-0.270067	0.981	0.932	1
ADM	0.0131343	-0.27152	0.019	0.138	1
SDCBP	0.00300705	-0.271821	0.827	0.843	1
ATP2B1-AS1	0.14649	-0.272587	0.288	0.37	1
BTG2	0.0764894	-0.273052	0.75	0.804	1
CXCR4	0.946912	-0.273444	0.942	0.851	1
LMNA	0.136799	-0.274195	0.212	0.306	1
EZR	0.0133335	-0.274461	0.712	0.754	1
NEDD9	0.0840525	-0.274908	0.231	0.324	1
MSR1	0.0230396	-0.276876	0.212	0.351	1
MCL1	0.0418514	-0.277536	0.865	0.884	1
LAMP3	0.201245	-0.278804	0.096	0.157	1
IFRD1	0.0273599	-0.284031	0.212	0.343	1
ZFAND2A	0.198345	-0.28467	0.212	0.285	1
CDC42EP3	0.00466121	-0.286083	0.212	0.39	1
CCRL2	0.0233812	-0.287756	0.192	0.331	1
EIF5	0.0258766	-0.288396	0.808	0.81	1
DUT	0.282776	-0.290773	0.654	0.653	1
UBE2C	0.0126102	-0.293039	0	0.109	1
SLAMF8	0.04849	-0.293467	0.346	0.44	1
OTUD1	0.00663505	-0.294306	0.135	0.322	1
A2M	0.0334999	-0.294656	0.365	0.512	1
MYADM	0.24185	-0.297215	0.731	0.671	1
HSPA5	0.0327992	-0.297241	0.904	0.876	1
ARRDC3	0.0164656	-0.300167	0.462	0.579	1
EMP1	0.0745193	-0.302052	0.135	0.24	1
CYTIP	0.246514	-0.307288	0.712	0.7	1
PTMS	0.0293043	-0.307718	0.519	0.599	1
CA2	0.0810565	-0.307938	0.135	0.238	1
NINJ1	0.0533632	-0.308753	0.385	0.479	1
B3GNT5	0.026789	-0.309711	0.635	0.713	1
HIST1H4C	0.949692	-0.311137	0.577	0.531	1
EZH2	0.0347507	-0.313376	0.173	0.289	1
TREM1	0.0132446	-0.316251	0.096	0.242	1
FCGR2B	0.0112321	-0.317874	0.788	0.828	1
CST7	0.859063	-0.320502	0.462	0.434	1
PHLDA1	0.107185	-0.321655	0.212	0.318	1
SNAI1	0.0179537	-0.323878	0.077	0.203	1
IRF1	0.0625469	-0.324009	0.288	0.419	1
PPIF	0.0895219	-0.324047	0.462	0.51	1
CD44	0.00583919	-0.327141	0.827	0.81	1
HMOX1	0.140141	-0.329121	0.442	0.5	1
ARL4A	0.0785813	-0.330416	0.25	0.335	1
IFIT1	0.892471	-0.330501	0.327	0.293	1
RETN	0.0775562	-0.33222	0.096	0.19	1
CH25H	0.049258	-0.333513	0.038	0.13	1
PNRC1	0.072376	-0.337026	1	0.942	1
IFI27	0.023724	-0.339621	0.404	0.238	1
VEGFA	0.0479232	-0.340016	0.269	0.364	1
TUBA1C	0.0462658	-0.340558	0.596	0.672	1
IL1RN	0.0563673	-0.340662	0.173	0.298	1
DUSP6	0.0916246	-0.351134	0.442	0.504	1
IFIT3	0.867098	-0.352895	0.385	0.36	1
FCGR2A	0.00886251	-0.354896	0.904	0.884	1
MARCKS	0.00203949	-0.355637	0.423	0.632	1
HERPUD1	0.0121379	-0.356084	0.827	0.884	1
CD55	0.00936963	-0.358837	0.404	0.576	1
CKS2	0.139612	-0.359282	0.404	0.452	1
TUBB	0.996096	-0.359773	0.923	0.798	1
TK1	0.170114	-0.360803	0.096	0.157	1
HMGB2	0.498622	-0.361015	0.827	0.7	1
ZNF331	0.118267	-0.370132	0.135	0.225	1
TYMS	0.204382	-0.370295	0.096	0.151	1
TIPARP	0.329651	-0.370929	0.538	0.516	1
ARL5B	0.0338244	-0.371004	0.154	0.271	1
CHMP1B	0.0592926	-0.372477	0.5	0.558	1
CENPF	0.347325	-0.373543	0.154	0.196	1
PLEK2	0.000536522	-0.375515	0.154	0.393	1
TRIB1	0.00544943	-0.377569	0.423	0.572	1
CSRNP1	0.00581418	-0.378214	0.212	0.368	1
PRDM1	0.260528	-0.379585	0.269	0.322	1
C1QB	0.797663	-0.380804	0.712	0.636	1
PRDX1	0.00170924	-0.386081	0.923	0.905	1
AL138899.1	0.0003308	-0.390931	0.077	0.318	1
HCAR2	0.00750167	-0.39269	0.038	0.186	1
IFIT2	0.779557	-0.395971	0.365	0.359	1
BIRC3	0.061895	-0.39935	0.25	0.345	1
H2AFZ	0.35259	-0.401457	0.904	0.853	1
PDK4	0.0011867	-0.412483	0.154	0.37	1
ID3	0.155266	-0.412784	0.462	0.475	1
GADD45G	0.00297962	-0.41362	0.058	0.231	1
SOCS3	0.00264642	-0.41466	0.269	0.452	1
NUSAP1	0.0649148	-0.416044	0.135	0.231	1
INSIG1	0.097695	-0.419321	0.288	0.372	1
SUCNR1	0.000261123	-0.420134	0.096	0.333	1
VSIG4	0.00133263	-0.42226	0.115	0.329	1
CLEC10A	0.0003862	-0.423578	0.404	0.655	1
OGFRL1	0.00550158	-0.431293	0.788	0.826	1
FCN1	0.0147928	-0.434023	0.058	0.188	1
MAFF	0.00264385	-0.437696	0.115	0.295	1
KLF2	0.00320466	-0.449598	0.135	0.308	1
AREG	0.151329	-0.456749	0.308	0.384	1
JUNB	0.00210063	-0.456926	0.904	0.959	1
RGS16	0.509161	-0.458111	0.212	0.233	1
CFLAR	0.00102678	-0.45936	0.808	0.835	1
DNAJB4	0.0161487	-0.466978	0.25	0.384	1
CD1A	0.685751	-0.471094	0.519	0.417	1
NLRP3	0.0485222	-0.471767	0.365	0.457	1
PHACTR1	0.0584722	-0.474137	0.5	0.57	1
RHOB	1.33011e-05	-0.475186	0.212	0.521	0.345682
PMAIP1	0.00496514	-0.482455	0.269	0.453	1
HSPD1	0.0167385	-0.484781	0.962	0.878	1
CD9	0.000707516	-0.486363	0.404	0.614	1
CLK1	0.000363087	-0.494942	0.481	0.671	1
UBC	2.0168e-05	-0.497762	1	0.992	0.524146
PDE4B	0.0126916	-0.505901	0.308	0.45	1
CD1C	0.00781898	-0.50653	0.731	0.777	1
ZFAND5	0.000223839	-0.508012	0.75	0.876	1
HSPE1	0.0262029	-0.512411	0.827	0.841	1
ID2	0.023022	-0.516415	0.885	0.886	1
FCGBP	0.00726494	-0.519009	0.096	0.254	1
MT2A	0.187893	-0.521179	0.635	0.64	1
CD1E	0.002088	-0.529896	0.5	0.678	1
MAFB	0.000433907	-0.53079	0.212	0.475	1
SOD2	0.00347536	-0.540075	0.288	0.469	1
TOP2A	0.0589539	-0.547093	0.058	0.147	1
PPP1R15B	5.34074e-05	-0.566337	0.269	0.531	1
CD207	0.3711	-0.571014	0.327	0.353	1
NAMPT	7.38436e-05	-0.571675	0.308	0.568	1
FOSB	0.000102303	-0.57646	0.519	0.684	1
RASGEF1B	0.000329884	-0.576579	0.154	0.38	1
WFDC21P	0.513599	-0.577991	0.692	0.55	1
MKI67	0.106203	-0.578969	0.077	0.153	1
DUSP1	0.00835491	-0.579792	0.923	0.94	1
PTGER4	0.00286891	-0.580268	0.365	0.547	1
MRC1	0.0235448	-0.583036	0.5	0.554	1
DNAJA1	0.000268775	-0.584138	0.904	0.913	1
HLA-DQB2	0.00462935	-0.596749	0.077	0.242	1
PTGS2	0.0194955	-0.601839	0.173	0.318	1
HLA-DQA2	0.000542906	-0.602134	0.154	0.384	1
HSP90AB1	1.12533e-05	-0.607321	1	0.994	0.292463
KLF4	0.00197557	-0.610314	0.5	0.638	1
TNF	0.0422018	-0.611936	0.288	0.407	1
HSPB1	0.132517	-0.611941	0.885	0.872	1
DUSP5	0.00150386	-0.622044	0.154	0.349	1
SGK1	0.000322859	-0.631156	0.865	0.897	1
LGALS3	0.0262732	-0.644279	0.654	0.649	1
MT-RNR2	1.57536e-08	-0.655148	1	1	0.00040942
PLIN2	0.0492995	-0.68655	0.596	0.705	1
IER5	0.00134786	-0.686639	0.519	0.672	1
RIPK2	0.00115312	-0.690766	0.404	0.543	1
EGR1	0.000301118	-0.692056	0.635	0.793	1
SAT1	3.75494e-05	-0.694372	1	0.986	0.975872
CD1B	0.0027119	-0.706244	0.173	0.347	1
RGS1	0.00193434	-0.714958	0.923	0.946	1
NFKBIA	0.00372184	-0.717337	1	0.996	1
HSPH1	0.0022854	-0.718846	0.692	0.781	1
EGR2	4.08192e-05	-0.719087	0.288	0.558	1
PLEK	0.00425339	-0.727158	0.962	0.928	1
CCL17	0.910091	-0.730382	0.615	0.496	1
MT-RNR1	1.1729e-11	-0.739829	1	1	3.04824e-07
SPP1	0.164402	-0.750299	0.154	0.225	1
CDKN1A	0.000434416	-0.750564	0.596	0.686	1
STMN1	0.198529	-0.751193	0.481	0.496	1
TNFAIP3	0.0553481	-0.753304	0.788	0.736	1
RGS2	0.00111754	-0.759017	0.788	0.812	1
PLAUR	0.000224917	-0.76125	0.365	0.535	1
CLDN1	0.00186373	-0.761318	0.442	0.576	1
JUN	0.00204302	-0.766001	1	0.981	1
HLA-DRB6	0.00361927	-0.766078	0.096	0.277	1
CCL22	0.101545	-0.770774	0.096	0.184	1
TWISTNB	0.00526968	-0.802319	0.327	0.488	1
IER3	0.0092179	-0.805796	0.846	0.839	1
ICAM1	4.30844e-06	-0.807255	0.346	0.597	0.111972
IER2	1.21807e-06	-0.820161	0.788	0.895	0.0316565
CCNL1	9.19164e-08	-0.824743	0.673	0.847	0.00238882
NFKBIZ	2.19241e-05	-0.840741	0.231	0.519	0.569785
RGCC	0.00101914	-0.863015	0.25	0.453	1
BAG3	0.0016231	-0.877113	0.096	0.297	1
NR4A1	0.00224522	-0.888907	0.462	0.57	1
FOS	4.49563e-05	-0.897764	1	0.977	1
GPR183	2.29525e-05	-0.922016	0.788	0.905	0.596513
HSP90AA1	8.44297e-07	-0.940841	1	0.998	0.0219424
ZFP36	3.82619e-07	-0.990818	0.962	0.969	0.00994388
DNAJB1	0.000861104	-0.998524	0.731	0.795	1
HSPA1B	5.10419e-05	-1.00472	0.519	0.69	1
BCL2A1	3.37411e-07	-1.03023	0.288	0.616	0.00876897
C15orf48	0.000326173	-1.04848	0.173	0.403	1
NR4A3	1.29283e-06	-1.06935	0.038	0.378	0.0335993
CXCL10	0.177732	-1.07258	0.077	0.14	1
CXCL2	0.0738737	-1.08789	0.173	0.254	1
GADD45B	3.47482e-07	-1.09553	0.635	0.831	0.0090307
PPP1R15A	8.82192e-05	-1.10311	0.5	0.661	1
DUSP2	8.42576e-05	-1.1146	0.173	0.426	1
NR4A2	5.73701e-06	-1.12065	0.115	0.426	0.149099
KLF6	1.12574e-07	-1.13656	0.904	0.95	0.00292568
CXCL8	2.60369e-05	-1.22797	0.25	0.537	0.676673
HSPA1A	9.13161e-06	-1.27427	0.846	0.882	0.237321
CCL3	4.48644e-05	-1.28616	0.385	0.645	1
CCL3L1	0.00010469	-1.29696	0.404	0.603	1
CD83	6.37748e-08	-1.31147	0.308	0.655	0.00165744
ATF3	4.12868e-05	-1.3155	0.288	0.543	1
G0S2	0.00454491	-1.32734	0.077	0.238	1
CCL4	0.0121389	-1.33304	0.558	0.624	1
IL1B	0.000731303	-1.45776	0.596	0.686	1
CCL4L2	0.000225326	-1.55135	0.481	0.638	1
